# Supplementary material
Source: ML conference proceedings conference paper supplement (https://openreview.net/forum?id=a2svOXTVgO)
Supplement: supplementary_material [file attachment]

## 396 A Proof of Theorem 2.3

### 397 A.1 Notations

398 We first define some notations in the context of the model (1). For  $p \geq 1$  and  $d \geq 1$ , define

$$\mathcal{A}_{p,d} := \left\{ \prod_{j=1}^p [\ell_j, u_j] \in \mathcal{A} \mid \#\{j \in [p] \mid [\ell_j, u_j] \neq [0, 1]\} \leq d \right\} \quad (21)$$

399 That is, each rectangle in  $\mathcal{A}_{p,d}$  has at most  $d$  dimensions that are not the full interval  $[0, 1]$ . Note that for a  
400 decision tree with depth  $d$ , each leaf node represents a rectangle in  $\mathcal{A}_{p,d}$ . Furthermore, for  $\delta \in (0, 1)$ , define  
401 values

$$\begin{aligned} \bar{t}_1(\delta) &= \bar{t}_1(\delta, n, d) := \frac{4}{n} \log(2p^d(n+1)^{2d}/\delta) \\ \bar{t}_2(\delta) &= \bar{t}_2(\delta, n, d) := \frac{2\bar{\theta}e^2 d}{n} \vee \frac{\log(p^d(n+1)^{2d}/\delta)}{n} \\ \bar{t}(\delta) &= \bar{t}(\delta, n, d) := \bar{t}_1(\delta, n, d) \vee \bar{t}_2(\delta, n, d) \end{aligned} \quad (22)$$

402 where  $\bar{\theta}$  is the constant in Assumption 2.1 (i). Note that we have  $\bar{t}(\delta) \leq O(d \log(np/\delta)/n)$ .

403 For two values  $a, b > 0$ , we write  $a \lesssim b$  if there is a universal constant  $C > 0$  such that  $a \leq Cb$ . We write  
404  $a \lesssim_r b$  if there is a constant  $C_r$  that only depends on  $r$  such that  $a \leq C_r b$ .

### 405 A.2 Technical lemmas

406 Now we can introduce the major technical results to establish the error bound.

407 **Lemma A.1** *Suppose Assumption 2.1 holds true. Suppose  $\bar{t}_2(\delta/12) < 3/4$ . Then with probability at least*  
408  *$1 - \delta$ , it holds*

$$\sup_{A \in \mathcal{A}_{p,d}} \sqrt{\mathbb{P}(X \in A)} \left| \mathbb{E}(f^*(X)|X \in A) - \bar{y}_{\mathcal{I}_A} \right| \leq 20U \sqrt{\bar{t}(\delta/12)} \quad (23)$$

409 The proof of Lemma A.1 is presented in Section A.4. Note that Lemma A.1 provides a uniform bound on the  
410 gap between the populational mean  $\mathbb{E}(f^*(X)|X \in A)$  and the sample mean  $\bar{y}_{\mathcal{I}_A}$ . This is used to derive the  
411 geometric decrease of the bias, using the SID assumption.

412 **Lemma A.2** *Suppose Assumption 2.1 holds true. Given any  $\delta \in (0, 1)$ , suppose  $\bar{t}_2(\delta/4) < 3/4$ . Then with*  
413 *probability at least  $1 - \delta$  it holds*

$$\sup_{A \in \mathcal{A}_{p,d}} \left| \sqrt{\mathbb{P}(X \in A)} - \sqrt{|\mathcal{I}_A|/n} \right| \leq 5\sqrt{\bar{t}(\delta/4)} \quad (24)$$

414 The proof of Lemma A.2 is presented in Section A.5. Lemma A.2 provides a uniform deviation gap between the  
415 square root of probability and sample frequency over all sets in  $\mathcal{A}_{p,d}$ . Note that this uniform bound is stronger  
416 than a result without a square root (which can be obtained easily via Hoeffding's inequality and a union bound),  
417 and is useful to prove the final error bound in Theorem 2.3.

418 For any rectangle  $A \in \mathcal{A}$ ,  $j \in [p]$  and  $b \in \mathbb{R}$ , define

$$\begin{aligned} \Delta_L(A, j, b) &:= \mathbb{P}(X \in A_L) \left( \mathbb{E}(f^*(X)|X \in A) - \mathbb{E}(f^*(X)|X \in A_L) \right)^2 \\ \Delta_R(A, j, b) &:= \mathbb{P}(X \in A_R) \left( \mathbb{E}(f^*(X)|X \in A) - \mathbb{E}(f^*(X)|X \in A_R) \right)^2 \\ \widehat{\Delta}_L(A, j, b) &:= \frac{|\mathcal{I}_{A_L}|}{n} (\bar{y}_{\mathcal{I}_{A_L}} - \bar{y}_{\mathcal{I}_A})^2 \\ \widehat{\Delta}_R(A, j, b) &:= \frac{|\mathcal{I}_{A_R}|}{n} (\bar{y}_{\mathcal{I}_{A_R}} - \bar{y}_{\mathcal{I}_A})^2 \end{aligned}$$

419 We have the following identity regarding the impurity decrease of each split.

420 **Lemma A.3** *For any rectangle  $A \in \mathcal{A}$ ,  $j \in [p]$  and  $b \in \mathbb{R}$ , it holds*

$$\begin{aligned} \Delta(A, j, b) &= \Delta_L(A, j, b) + \Delta_R(A, j, b) \\ \widehat{\Delta}(A, j, b) &= \widehat{\Delta}_L(A, j, b) + \widehat{\Delta}_R(A, j, b) \end{aligned} \quad (25)$$

421 *Proof.* We just present the proof of the second equality. The proof of the first equality can be proved similarly.  
 422 Note that

$$\begin{aligned}\widehat{\Delta}(A, j, b) &= \frac{1}{n} \sum_{i \in \mathcal{I}_A} (y_i - \bar{y}_{\mathcal{I}_A})^2 - \frac{1}{n} \sum_{i \in \mathcal{I}_{A_L}} (y_i - \bar{y}_{\mathcal{I}_{A_L}})^2 - \frac{1}{n} \sum_{i \in \mathcal{I}_{A_R}} (y_i - \bar{y}_{\mathcal{I}_{A_R}})^2 \\ &= \frac{1}{n} \sum_{i \in \mathcal{I}_{A_L}} \left[ (y_i - \bar{y}_{\mathcal{I}_A})^2 - (y_i - \bar{y}_{\mathcal{I}_{A_L}})^2 \right] + \frac{1}{n} \sum_{i \in \mathcal{I}_{A_R}} \left[ (y_i - \bar{y}_{\mathcal{I}_A})^2 - (y_i - \bar{y}_{\mathcal{I}_{A_R}})^2 \right]\end{aligned}\quad (26)$$

423 For the first term, we have

$$\begin{aligned}& \frac{1}{n} \sum_{i \in \mathcal{I}_{A_L}} \left[ (y_i - \bar{y}_{\mathcal{I}_A})^2 - (y_i - \bar{y}_{\mathcal{I}_{A_L}})^2 \right] \\ &= \frac{1}{n} \sum_{i \in \mathcal{I}_{A_L}} \left[ (y_i - \bar{y}_{\mathcal{I}_A})^2 - (y_i - \bar{y}_{\mathcal{I}_{A_L}})^2 - 2(y_i - \bar{y}_{\mathcal{I}_A})(\bar{y}_{\mathcal{I}_A} - \bar{y}_{\mathcal{I}_{A_L}}) - (\bar{y}_{\mathcal{I}_A} - \bar{y}_{\mathcal{I}_{A_L}})^2 \right] \\ &= \frac{|\mathcal{I}_{A_L}|}{n} (\bar{y}_{\mathcal{I}_A} - \bar{y}_{\mathcal{I}_{A_L}})^2 = \widehat{\Delta}_L(A, j, b)\end{aligned}\quad (27)$$

424 Similarly, we have

$$\frac{1}{n} \sum_{i \in \mathcal{I}_{A_R}} \left[ (y_i - \bar{y}_{\mathcal{I}_A})^2 - (y_i - \bar{y}_{\mathcal{I}_{A_R}})^2 \right] = \widehat{\Delta}_R(A, j, b)\quad (28)$$

425 The proof is complete by combining (26), (27) and (28).  $\square$

426 **Lemma A.4** *Suppose Assumption 2.1 holds true. Given a constant  $\alpha > 0$ . Given any  $\delta \in (0, 1)$ , suppose*  
 427  *$\bar{t}_2(\delta/36) < 3/4$ . Then with probability at least  $1 - \delta$ , it holds*

$$\Delta(A, j, b) \leq (1 + \alpha) \widehat{\Delta}(A, j, b) + (1 + 1/\alpha) \cdot 5000U^2 \bar{t}(\delta/36) \quad \forall A \in \mathcal{A}_{p,d-1}, j \in [p], b \in \mathbb{R}\quad (29)$$

428 and

$$\widehat{\Delta}(A, j, b) \leq (1 + \alpha) \Delta(A, j, b) + (1 + 1/\alpha) \cdot 5000U^2 \bar{t}(\delta/36) \quad \forall A \in \mathcal{A}_{p,d-1}, j \in [p], b \in \mathbb{R}\quad (30)$$

429 *Proof.* For  $A \in \mathcal{A}_{p,d-1}, j \in [p]$  and  $a \in \mathbb{R}$ , by Lemma A.3 we have

$$\begin{aligned}\Delta(A, j, b) &= \Delta_L(A, j, b) + \Delta_R(A, j, b) \\ \widehat{\Delta}(A, j, b) &= \widehat{\Delta}_L(A, j, b) + \widehat{\Delta}_R(A, j, b)\end{aligned}\quad (31)$$

430 Define the events  $\mathcal{E}_1$  and  $\mathcal{E}_2$ :

$$\begin{aligned}\mathcal{E}_1 &:= \left\{ \sup_{A \in \mathcal{A}_{p,d}} \sqrt{\mathbb{P}(X \in A)} \left| \mathbb{E}(f^*(X) | X \in A) - \bar{y}_{\mathcal{I}_A} \right| \leq 20U \sqrt{\bar{t}(\delta/36)} \right\} \\ \mathcal{E}_2 &:= \left\{ \sup_{A \in \mathcal{A}_{p,d}} \left| \sqrt{\mathbb{P}(X \in A)} - \sqrt{|\mathcal{I}_A|/n} \right| \leq 5\sqrt{\bar{t}(\delta/12)} \right\}\end{aligned}$$

431 Then by Lemmas A.1 and A.2, we have  $\mathbb{P}(\mathcal{E}_i) \geq 1 - \delta/3$  for  $i = 1, 2$ , so we have  $\mathbb{P}(\cap_{i=1}^2 \mathcal{E}_i) \geq 1 - \delta$ . Below  
 432 we prove (29) and (30) conditioned on the events  $\mathcal{E}_1$  and  $\mathcal{E}_2$ .

433 Note that

$$\begin{aligned}\sqrt{\Delta_L(A, j, a)} &= \sqrt{\mathbb{P}(X \in A_L)} \left| \mathbb{E}(f^*(X) | X \in A) - \mathbb{E}(f^*(X) | X \in A_L) \right| \\ &\leq \sqrt{\mathbb{P}(X \in A_L)} \left| \mathbb{E}(f^*(X) | X \in A) - \bar{y}_{\mathcal{I}_A} \right| + \sqrt{\mathbb{P}(X \in A_L)} \left| \bar{y}_{\mathcal{I}_A} - \bar{y}_{\mathcal{I}_{A_L}} \right| \\ &\quad + \sqrt{\mathbb{P}(X \in A_L)} \left| \bar{y}_{\mathcal{I}_{A_L}} - \mathbb{E}(f^*(X) | X \in A_L) \right| \\ &:= J_1 + J_2 + J_3\end{aligned}\quad (32)$$

434 To bound  $J_1$ , we have

$$J_1 \leq \sqrt{\mathbb{P}(X \in A)} \left| \mathbb{E}(f^*(X) | X \in A) - \bar{y}_{\mathcal{I}_A} \right| \leq 20U \sqrt{\bar{t}(\delta/36)}\quad (33)$$

435 where the second inequality is by event  $\mathcal{E}_1$ . Similarly, to bound  $J_3$ , we have

$$J_3 = \sqrt{\mathbb{P}(X \in A_L)} \left| \bar{y}_{\mathcal{I}_{A_L}} - \mathbb{E}(f^*(X) | X \in A_L) \right| \leq 20U \sqrt{\bar{t}(\delta/36)}\quad (34)$$

436 To bound  $J_2$ , note that

$$\begin{aligned} J_2 &\leq \left| \sqrt{\mathbb{P}(X \in A_L)} - \sqrt{|I_{A_L}|/n} \right| \cdot |\bar{y}_{I_{A_L}} - \bar{y}_{I_{A_L}}| + \sqrt{|I_{A_L}|/n} \cdot |\bar{y}_{I_{A_L}} - \bar{y}_{I_{A_L}}| \\ &\leq 5\sqrt{\bar{t}(\delta/12)} \cdot 2U + \sqrt{|I_{A_L}|/n} \cdot |\bar{y}_{I_{A_L}} - \bar{y}_{I_{A_L}}| \end{aligned} \quad (35)$$

437 where the second inequality made use of the event  $\mathcal{E}_2$ . Combining (32) – (35), we have

$$\begin{aligned} \sqrt{\Delta_L(A, j, b)} &\leq 40U\sqrt{\bar{t}(\delta/36)} + 10U\sqrt{\bar{t}(\delta/12)} + \sqrt{|I_{A_L}|/n} \cdot |\bar{y}_{I_{A_L}} - \bar{y}_{I_{A_L}}| \\ &\leq 50U\sqrt{\bar{t}(\delta/36)} + \sqrt{|I_{A_L}|/n} \cdot |\bar{y}_{I_{A_L}} - \bar{y}_{I_{A_L}}| \end{aligned}$$

438 which implies (by Young’s inequality)

$$\Delta_L(A, j, a) \leq (1 + 1/\alpha) \cdot 2500U^2\bar{t}(\delta/36) + (1 + \alpha) \frac{|I_{A_L}|}{n} |\bar{y}_{I_{A_L}} - \bar{y}_{I_{A_L}}|^2 \quad (36)$$

439 By a similar argument, we have

$$\Delta_R(A, j, a) \leq (1 + 1/\alpha) \cdot 2500U^2\bar{t}(\delta/36) + (1 + \alpha) \frac{|I_{A_R}|}{n} |\bar{y}_{I_{A_R}} - \bar{y}_{I_{A_R}}|^2 \quad (37)$$

440 Summing up (36) and (37), and by (31), we have

$$\Delta(A, j, a) \leq (1 + 1/\alpha) \cdot 5000U^2\bar{t}(\delta/36) + (1 + \alpha)\widehat{\Delta}(A, j, a)$$

441 This completes the proof of (29). The proof of (30) is by a similar argument.

442

□

443 Lemma A.4 provides upper bounds between  $\Delta(A, j, b)$  and  $\widehat{\Delta}(A, j, b)$ , which serves as a link to translate the  
444 population impurity decrease to sample impurity decrease. With all these technical lemmas at hand, we are ready  
445 to present the proof Theorem 2.3, as shown in the next subsection.

### 446 A.3 Completing the proof of Theorem 2.3

447 Define events

$$\mathcal{E}_1 := \left\{ \sup_{A \in \mathcal{A}_{p,d}} \sqrt{\mathbb{P}(X \in A)} \left| \mathbb{E}(f^*(X)|X \in A) - \bar{y}_{I_A} \right| \leq 20U\sqrt{\bar{t}(\delta/24)} \right\}$$

$$\mathcal{E}_2 := \left\{ \Delta(A, j, a) \leq (1 + \alpha)\widehat{\Delta}(A, j, a) + (1 + 1/\alpha) \cdot 5000U^2\bar{t}(\delta/72) \quad \forall A \in \mathcal{A}_{p,d-1}, j \in [p], a \in \mathbb{R} \right\}$$

$$\mathcal{E}_3 := \left\{ \widehat{\Delta}(A, j, a) \leq (1 + \alpha)\Delta(A, j, a) + (1 + 1/\alpha) \cdot 5000U^2\bar{t}(\delta/72) \quad \forall A \in \mathcal{A}_{p,d-1}, j \in [p], a \in \mathbb{R} \right\}$$

448 Then by Lemmas A.1 and A.4, and note that from the statement of Theorem 2.3,  $\bar{t}_2(\delta/72) < 3/4$ , so we have  
449  $\mathbb{P}(\mathcal{E}_1) \geq 1 - \delta/2$  and  $\mathbb{P}(\mathcal{E}_2 \cup \mathcal{E}_3) \geq 1 - \delta/2$ , which implies  $\mathbb{P}(\cup_{i=1}^3 \mathcal{E}_i) \geq 1 - \delta$ . In the following, we prove  
450 (10) using a deterministic argument conditioned on  $\cup_{i=1}^3 \mathcal{E}_i$ .

451 For any  $k \in [d]$  and any leave node  $t$  of  $\widehat{f}^{(k)}$  (recall that  $\widehat{f}^{(k)}$  is the decision tree by CART with depth  $k$ ), let  
452  $A_t^{(k)}$  be the corresponding cube, that is, for any  $x \in \mathbb{R}^p$ ,  $x \in A_t^{(k)}$  if and only if  $x$  is routed to  $t$  in  $\widehat{f}^{(k)}$ . Let  
453  $\mathcal{L}^{(k)}$  be the set of all leave nodes of  $\widehat{f}^{(k)}$ . Then we have

$$\widehat{f}^{(k)}(x) = \sum_{t \in \mathcal{L}^{(k)}} \bar{y}_{I_{A_t^{(k)}}} \mathbf{1}_{\{x \in A_t^{(k)}\}} \quad (38)$$

454 Define a function

$$\widetilde{f}^{(k)}(x) := \sum_{t \in \mathcal{L}^{(k)}} \mathbb{E}\left(f^*(X) \mid X \in A_t^{(k)}, \mathcal{X}_1^n\right) \cdot \mathbf{1}_{\{x \in A_t^{(k)}\}} \quad (39)$$

455 where  $\mathcal{X}_1^n$  is the set of iid random variables  $\{x_1, \dots, x_n\}$ , and  $X$  is a random variable having the same distribution  
456 as  $x_1$  but independent of  $\mathcal{X}_1^n$ . In other words,  $\widetilde{f}^{(k)}$  is a tree with the same splitting structure as  $\widehat{f}^{(k)}$  and replaces  
457 the prediction value of each leave node as the populational conditional mean of  $f^*(\cdot)$ .

458 First, using Cauchy-Schwarz inequality, we have

$$\|\widehat{f}^{(k)} - f^*\|_{L^2(X)}^2 \leq 2\|f^* - \widetilde{f}^{(k)}\|_{L^2(X)}^2 + 2\|\widetilde{f}^{(k)} - \widehat{f}^{(k)}\|_{L^2(X)}^2 := 2J_1(k) + 2J_2(k) \quad (40)$$

459 To bound  $J_1(d)$ , we derive recursive inequalities between  $J_1(k)$  and  $J_1(k+1)$  for all  $0 \leq k \leq d-1$ . Note that

$$\begin{aligned} J_1(k) &= \mathbb{E} \left( (f^*(X) - \widetilde{f}^{(k)}(X))^2 \mid \mathcal{X}_1^n \right) \\ &= \sum_{t \in \mathcal{L}^{(k)}} \mathbb{P}(X \in A_t \mid \mathcal{X}_1^n) \cdot \text{Var}(f^*(X) \mid X \in A_t, \mathcal{X}_1^n) \end{aligned} \quad (41)$$

460 For each  $t \in \mathcal{L}^{(k)}$ , let  $t_L$  and  $t_R$  be the two children of  $t$ , then we have

$$\begin{aligned} & \mathbb{P}(X \in A_t | \mathcal{X}_1^n) \cdot \text{Var}(f^*(X) | X \in A_t, \mathcal{X}_1^n) \\ &= \mathbb{P}(X \in A_{t_L} | \mathcal{X}_1^n) \cdot \text{Var}(f^*(X) | X \in A_{t_L}, \mathcal{X}_1^n) \\ & \quad + \mathbb{P}(X \in A_{t_R} | \mathcal{X}_1^n) \cdot \text{Var}(f^*(X) | X \in A_{t_R}, \mathcal{X}_1^n) + \Delta(A_t, \hat{j}_t, \hat{b}_t) \end{aligned} \quad (42)$$

where

$$(\hat{j}_t, \hat{b}_t) \in \underset{j \in [p], b \in \mathbb{R}}{\text{argmax}} \widehat{\Delta}(A_t, j, b)$$

Let us define

$$(j_t, b_t) \in \underset{j \in [p], b \in \mathbb{R}}{\text{argmax}} \Delta(A_t, j, b)$$

461 Then we have

$$\begin{aligned} \Delta(A_t, \hat{j}_t, \hat{b}_t) &\geq \frac{1}{1+\alpha} \widehat{\Delta}(A_t, \hat{j}_t, \hat{b}_t) - (5000/\alpha)U^2\bar{t}(\delta/72) \\ &\geq \frac{1}{1+\alpha} \widehat{\Delta}(A_t, j_t, b_t) - (5000/\alpha)U^2\bar{t}(\delta/72) \\ &\geq \frac{1}{(1+\alpha)^2} \Delta(A_t, j_t, b_t) - \frac{2+\alpha}{\alpha(1+\alpha)} 5000U^2\bar{t}(\delta/72) \end{aligned} \quad (43)$$

462 where the first inequality is by event  $\mathcal{E}_3$ , the second inequality is by the definition of  $(\hat{j}_t, \hat{b}_t)$ , and the third  
463 inequality is because of event  $\mathcal{E}_2$ . By Assumption 2.2, we have

$$\Delta(A_t, j_t, b_t) = \sup_{j \in [p], b \in \mathbb{R}} \Delta(A_t, j, b) \geq \lambda \cdot \mathbb{P}(X \in A_t | \mathcal{X}_1^n) \text{Var}(f^*(X) | X \in A_t, \mathcal{X}_1^n) \quad (44)$$

464 Combining (42), (43) and (44), we have

$$\begin{aligned} & \mathbb{P}(X \in A_{t_L} | \mathcal{X}_1^n) \cdot \text{Var}(f^*(X) | X \in A_{t_L}, \mathcal{X}_1^n) + \mathbb{P}(X \in A_{t_R} | \mathcal{X}_1^n) \cdot \text{Var}(f^*(X) | X \in A_{t_R}, \mathcal{X}_1^n) \\ & \leq \left(1 - \frac{\lambda}{(1+\alpha)^2}\right) \mathbb{P}(X \in A_t | \mathcal{X}_1^n) \cdot \text{Var}(f^*(X) | X \in A_t, \mathcal{X}_1^n) + \frac{2+\alpha}{\alpha(1+\alpha)} 5000U^2\bar{t}(\delta/72) \end{aligned}$$

465 Summing up the inequality above for all  $t \in \mathcal{L}^{(k)}$ , we have

$$J_1(k+1) \leq \left(1 - \frac{\lambda}{(1+\alpha)^2}\right) J_1(k) + 2^k \cdot \frac{2+\alpha}{\alpha(1+\alpha)} 5000U^2\bar{t}(\delta/72)$$

466 Using the inequality above recursively for  $k = 0, 1, \dots, d-1$ , we have

$$\begin{aligned} J_1(d) &\leq \left(1 - \frac{\lambda}{(1+\alpha)^2}\right)^d J_1(0) + \frac{2+\alpha}{\alpha(1+\alpha)} 5000U^2\bar{t}(\delta/72) \sum_{k=1}^d 2^{k-1} \\ &\leq \left(1 - \frac{\lambda}{(1+\alpha)^2}\right)^d \text{Var}(f^*(X)) + 2^d \cdot \frac{2+\alpha}{\alpha(1+\alpha)} 5000U^2\bar{t}(\delta/72) \end{aligned} \quad (45)$$

467 To bound  $J_2(d)$ , we have

$$\begin{aligned} J_2(d) &= \sum_{t \in \mathcal{L}^{(d)}} \mathbb{P}(X \in A_t) \left( \mathbb{E}(f^*(X) | X \in A_t, \mathcal{X}_1^n) - \bar{y}_{\mathcal{I}_{A_t}} \right)^2 \\ &\leq 2^d \cdot 400U^2\bar{t}(\delta/24) \end{aligned} \quad (46)$$

468 where the inequality made use of event  $\mathcal{E}_1$ .

469 Using (45) and (46), and recalling (40), we have

$$\begin{aligned} \|\hat{f}^{(k)} - f^*\|_{L^2(X)}^2 &\leq 2 \left(1 - \frac{\lambda}{(1+\alpha)^2}\right)^d \text{Var}(f^*(X)) + 2^{d+1} \cdot \frac{2+\alpha}{\alpha(1+\alpha)} 5000U^2\bar{t}(\delta/72) \\ & \quad + 2^{d+1} \cdot 400U^2\bar{t}(\delta/24) \\ &\lesssim \text{Var}(f^*(X)) \cdot (1 - \lambda/(1+\alpha)^2)^d + \frac{2+\alpha}{\alpha(1+\alpha)} \frac{2^d(d \log(np) + \log(1/\delta))}{n} U^2 \\ &\lesssim \text{Var}(f^*(X)) \cdot (1 - \lambda/(1+\alpha)^2)^d + \frac{2^d(d \log(np) + \log(1/\delta))}{\alpha n} U^2 \end{aligned} \quad (47)$$

470 This completes the proof of (10). To prove (11), by taking  $\alpha = 1/d$  and  $d = \lceil \log_2(n)/(1 - \log_2(1 - \lambda)) \rceil$ , we  
471 have

$$\begin{aligned} \left(1 - \frac{\lambda}{(1+\alpha)^2}\right)^d &= (1 - \lambda)^d \left(1 + \frac{\lambda}{1-\lambda} (1 - (1+\alpha)^{-2})\right)^d \\ &= (1 - \lambda)^d \left(1 + \frac{\lambda}{1-\lambda} \frac{2/d + 1/d^2}{(1 + 1/d)^2}\right)^d \lesssim_\lambda (1 - \lambda)^d \end{aligned} \quad (48)$$

472 Note that for  $s = \log_2(n)/(1 - \log_2(1 - \lambda))$  we have  $(1 - \lambda)^s = 2^s/n$ , hence by taking  $d = \lceil \log_2(n)/(1 -$   
 473  $\log_2(1 - \lambda)) \rceil$ , we have

$$(1 - \lambda)^d \leq \frac{2^d}{n} \leq 2n^{-1 + \frac{1}{1 - \log_2(1 - \lambda)}} = 2n^{-\phi(\lambda)}. \quad (49)$$

474 Combining (47), (48) and (49) and note that  $\text{Var}(f^*(X)) \leq M < U$ , we have

$$\begin{aligned} \|\widehat{f}^{(k)} - f^*\|_{L^2(X)}^2 &\lesssim_{\lambda, U} n^{-\phi(\lambda)} (d^2 \log(np) + d \log(1/\delta)) \\ &\lesssim_{\lambda, U} n^{-\phi(\lambda)} (\log^2(n) \log(np) + \log(n) \log(1/\delta)) \end{aligned}$$

475 this completes the proof of (11).

#### 476 A.4 Proof of Lemma A.1

477 The main idea of proving Lemma A.1 is to find a proper finite net of the set  $\mathcal{A}_{p,d}$ , control the gap on this net,  
 478 and finally prove the result for all  $A \in \mathcal{A}_{p,d}$  based on the approximation gap of the net. We need a few auxiliary  
 479 results. Let  $\mathcal{S} := \{0, 1/n, 2/n, \dots, (n-1)/n, 1\}$ , and define

$$\widetilde{\mathcal{A}}_{p,d} := \left\{ \prod_{j=1}^p [\ell_j, u_j] \in \mathcal{A}_{p,d} \mid \ell_j, u_j \in \mathcal{S} \text{ for all } j \in [p] \right\}$$

480 For any  $A = \prod_{j=1}^p [\ell_j, u_j] \in \mathcal{A}_{p,d}$ , define

$$A' = \prod_{j=1}^p [\ell'_j, u'_j]$$

481 where  $\ell'_j := \max \{s \in \mathcal{S} \mid s \leq \ell_j\}$ , and  $u'_j := \min \{s \in \mathcal{S} \mid s \geq u_j\}$ . Roughly speaking,  $A'$  is the smallest  
 482 box with all edges in  $\mathcal{S}$  that contains  $A$ . For any  $\widetilde{A} = \prod_{j=1}^p [\tilde{\ell}_j, \tilde{u}_j] \in \widetilde{\mathcal{A}}_{p,d}$  with  $\tilde{u}_j - \tilde{\ell}_j \geq 2/n$  for all  $j \in [p]$ ,  
 483 define

$$B(\widetilde{A}) := \widetilde{A} \setminus \prod_{j=1}^p \left[ \tilde{\ell}_j + (1/n) \cdot 1_{\{\tilde{\ell}_j \neq 0\}}, \tilde{u}_j - (1/n) \cdot 1_{\{\tilde{u}_j \neq 1\}} \right].$$

484 and define  $\mathcal{B}_{p,d}$  to be the set of all such sets, that is

$$\mathcal{B}_{p,d} := \left\{ B(\widetilde{A}) \mid \widetilde{A} = \prod_{j=1}^p [\tilde{\ell}_j, \tilde{u}_j] \in \widetilde{\mathcal{A}}_{p,d} \text{ with } \tilde{u}_j - \tilde{\ell}_j \geq 2/n \right\}$$

485 The following lemma can be easily verified from the definitions of  $\widetilde{\mathcal{A}}_{p,d}$  and  $\mathcal{B}_{p,d}$ .

486 **Lemma A.5** (1) For any  $A \in \mathcal{A}_{p,d}$ , there exists  $B \in \mathcal{B}_{p,d}$  such that  $A' \setminus A \subseteq B$ .

487 (2)  $\mathbb{P}(X \in B) \leq 2\bar{\theta}d/n$  for all  $B \in \mathcal{B}_{p,d}$ .

488 (3) The cardinality

$$|\mathcal{B}_{p,d}| \leq |\widetilde{\mathcal{A}}_{p,d}| \leq \binom{p}{d} (n+1)^{2d} \leq p^d (n+1)^{2d}$$

489 Finally, for any  $t \geq 0$ , we define

$$\mathcal{A}_{p,d}(t) := \left\{ A \in \mathcal{A}_{p,d} \mid \mathbb{P}(X \in A) \leq t \right\}, \quad \text{and} \quad \widetilde{\mathcal{A}}_{p,d}(t) := \left\{ A \in \widetilde{\mathcal{A}}_{p,d} \mid \mathbb{P}(X \in A) \leq t \right\}$$

490

491 **Lemma A.6** Suppose Assumption 2.1 holds true. Let  $z_1, \dots, z_n$  be i.i.d. bounded random variables with  
 492  $|z_1| \leq V < \infty$  almost surely. Assume that for each  $i \in [n]$ ,  $z_i$  is independent of  $\{x_j\}_{j \neq i}$ , but may be dependent  
 493 on  $x_i$ . Given any  $\delta \in (0, 1)$ , with probability at least  $1 - \delta$ , it holds

$$\max_{A \in \widetilde{\mathcal{A}}_{p,d} \setminus \widetilde{\mathcal{A}}_{p,d}(\bar{t}_1(\delta))} \frac{1}{\sqrt{\mathbb{P}(X \in A)}} \left| \frac{1}{n} \sum_{i=1}^n z_i 1_{\{x_i \in A\}} - \mathbb{E}(z_1 1_{\{x_1 \in A\}}) \right| \leq 2V \sqrt{\bar{t}_1(\delta)}$$

494 where  $U = M + m$ .

495 *Proof.* For each fixed  $A \in \widetilde{\mathcal{A}}_{p,d} \setminus \widetilde{\mathcal{A}}_{p,d}(\bar{t}_1(\delta))$ , note that

$$\left| \mathbb{E} \left( (z_1 1_{\{x_1 \in A\}} - \mathbb{E}(z_1 1_{\{x_1 \in A\}}))^k \right) \right| \leq (2V)^k \mathbb{P}(X \in A) \quad \forall k \geq 2$$

496 so by Lemma D.1 with  $t = 2V\sqrt{\mathbb{P}(X \in A)}\sqrt{\bar{t}_1(\delta)}$ ,  $\gamma^2 = (2V)^2\mathbb{P}(X \in A)$  and  $b = 2V$ , we have

$$\begin{aligned} & \mathbb{P}\left(\frac{1}{\sqrt{\mathbb{P}(X \in A)}}\left|\frac{1}{n}\sum_{i=1}^n z_i 1_{\{x_i \in A\}} - \mathbb{E}(z_1 1_{\{x_1 \in A\}})\right| > 2V\sqrt{\bar{t}_1(\delta)}\right) \\ & \leq 2\exp\left(-\frac{n}{4}\left(\frac{4V^2\mathbb{P}(X \in A)\bar{t}_1(\delta)}{4V^2\mathbb{P}(X \in A)} \wedge \frac{2V\sqrt{\mathbb{P}(X \in A)\bar{t}_1(\delta)}}{2V}\right)\right) \\ & \stackrel{(i)}{=} 2\exp\left(-\frac{n}{4}\bar{t}_1(\delta)\right) = \delta/(p^d(n+1)^{2d}) \end{aligned}$$

497 where (i) is because  $\mathbb{P}(X \in A) \geq \bar{t}_1(\delta)$  (since  $A \in \tilde{\mathcal{A}}_{p,d} \setminus \tilde{\mathcal{A}}_{p,d}(\bar{t}_1(\delta))$ ). As a result, we have

$$\begin{aligned} & \mathbb{P}\left(\max_{A \in \tilde{\mathcal{A}}_{p,d} \setminus \tilde{\mathcal{A}}_{p,d}(\bar{t}_1(\delta))} \frac{1}{\sqrt{\mathbb{P}(X \in A)}}\left|\frac{1}{n}\sum_{i=1}^n z_i 1_{\{x_i \in A\}} - \mathbb{E}(z_1 1_{\{x_1 \in A\}})\right| > 2V\sqrt{\bar{t}_1(\delta)}\right) \\ & \leq \sum_{A \in \tilde{\mathcal{A}}_{p,d} \setminus \tilde{\mathcal{A}}_{p,d}(\bar{t}_1(\delta))} \mathbb{P}\left(\frac{1}{\sqrt{\mathbb{P}(X \in A)}}\left|\frac{1}{n}\sum_{i=1}^n z_i 1_{\{x_i \in A\}} - \mathbb{E}(z_1 1_{\{x_1 \in A\}})\right| > 2V\sqrt{\bar{t}_1(\delta)}\right) \\ & \leq |\tilde{\mathcal{A}}_{p,d} \setminus \tilde{\mathcal{A}}_{p,d}(\bar{t}_1(\delta))| \cdot \delta/(p^d(n+1)^{2d}) \leq \delta \end{aligned}$$

498 where the last inequality makes use of Lemma A.5 (3).

499

□

500 **Lemma A.7** Let  $\mathcal{D}$  be a finite collection of measurable subsets of  $[0, 1]^p$  satisfying  $\mathbb{P}(X \in D) \leq \bar{\alpha}$  for all  
501  $D \in \mathcal{D}$  (for some constant  $\bar{\alpha} \in (0, 1)$ ). Given any  $\delta \in (0, 1)$ , if

$$w(\bar{\alpha}, \delta) := (e^2\bar{\alpha}) \vee \frac{\log(|\mathcal{D}|/\delta)}{n} \leq 3/4$$

502 then with probability at least  $1 - \delta$  it holds

$$\max_{D \in \mathcal{D}} \left\{ \frac{1}{n} \sum_{i=1}^n 1_{\{x_i \in D\}} \right\} \leq w(\bar{\alpha}, \delta)$$

503 *Proof.* For any fixed  $D \in \mathcal{D}$ , denote  $\alpha = \mathbb{P}(X \in D)$ , then by Lemma D.2, for any  $t \in (0, 3/4]$ , we have

$$\begin{aligned} \mathbb{P}\left(\frac{1}{n}\sum_{i=1}^n 1_{\{x_i \in D\}} > t\right) & \leq \exp\left(-n\left(t\log(t/\alpha) + (1-t)\log\left(\frac{1-t}{1-\alpha}\right)\right)\right) \\ & \leq \exp(-n(t\log(t/\alpha) + (1-t)\log(1-t))) \\ & \leq \exp(-n(t\log(t/\alpha) + (1-t)(-t-t^2))) \\ & = \exp(-n(t(\log(t/\alpha) - 1) + t^3)) \\ & \leq \exp(-nt(\log(t/\alpha) - 1)) \end{aligned}$$

504 where the third inequality makes use of Lemma D.3 and the assumption  $t \leq 3/4$ . Take  $t = w(\bar{\alpha}, \delta)$ , and note  
505 that

$$\log(w(\bar{\alpha}, \delta)/\alpha) - 1 \geq \log(w(\bar{\alpha}, \delta)/\bar{\alpha}) - 1 \geq \log(e^2) - 1 \geq 1$$

506 we have

$$\mathbb{P}\left(\frac{1}{n}\sum_{i=1}^n 1_{\{x_i \in B\}} > w(\bar{\alpha}, \delta)\right) \leq \exp(-nw(\bar{\alpha}, \delta)) \leq \delta/|\mathcal{D}|$$

507 where the last inequality is because of the definition of  $w(\bar{\alpha}, \delta)$ . Taking the union bound we have

$$\mathbb{P}\left(\max_{D \in \mathcal{D}} \left\{ \frac{1}{n} \sum_{i=1}^n 1_{\{x_i \in D\}} \right\} > w(\bar{\alpha}, \delta)\right) \leq |\mathcal{D}| \cdot \delta/|\mathcal{D}| = \delta$$

508

□

509 **Corollary A.8** Under Assumption 2.1 and given  $\delta \in (0, 1)$ , suppose  $\bar{t}_2(\delta) < 3/4$ , then with probability at least  
510  $1 - \delta$ , it holds

$$\max_{B \in \mathcal{B}_{p,d}} \left\{ \frac{1}{n} \sum_{i=1}^n 1_{\{x_i \in B\}} \right\} \leq \bar{t}_2(\delta)$$

511 *Proof.* Apply Lemma A.7 with  $\mathcal{D} = \mathcal{B}_{p,d}$  and  $\bar{\alpha} = 2\bar{\theta}d/n$ , and note that  $|\mathcal{B}_{p,d}| \leq (n+1)^{2d}p^d$  (by Lemma A.5  
512 (3)) and the definition  $\bar{t}_2(\delta) = \frac{2\bar{\theta}e^2d}{n} \sqrt{\frac{\log(p^d(n+1)^{2d}/\delta)}{n}}$ .  $\square$

513 **Lemma A.9** *Suppose Assumption 2.1 holds true. Let  $z_1, \dots, z_n$  be i.i.d. bounded random variables with*  
514  *$|Z| \leq V < \infty$  almost surely. Assume that for each  $i \in [n]$ ,  $z_i$  is independent of  $\{x_j\}_{j \neq i}$ , but may be dependent*  
515 *on  $x_i$ . Given any  $\delta \in (0, 1)$ , suppose  $\bar{t}_2(\delta/2) < 3/4$ , then with probability at least  $1 - \delta$ , it holds*

$$\sup_{A \in \mathcal{A}_{p,d} \setminus \mathcal{A}_{p,d}(\bar{t}(\delta/2))} \frac{1}{\sqrt{\mathbb{P}(X \in A)}} \left| \frac{1}{n} \sum_{i=1}^n z_i 1_{\{x_i \in A\}} - \mathbb{E}(z_1 1_{\{x_1 \in A\}}) \right| \leq 5V \sqrt{\bar{t}(\delta/2)}. \quad (50)$$

516 *Proof.* Define events  $\mathcal{E}_1$  and  $\mathcal{E}_2$ :

$$\mathcal{E}_1 := \left\{ \max_{B \in \mathcal{B}_{p,d}} \left\{ \frac{1}{n} \sum_{i=1}^n 1_{\{x_i \in B\}} \right\} \leq \bar{t}_2(\delta/2) \right\}$$

$$\mathcal{E}_2 := \left\{ \max_{A \in \tilde{\mathcal{A}}_{p,d} \setminus \mathcal{A}_{p,d}(\bar{t}_1(\delta/2))} \frac{1}{\sqrt{\mathbb{P}(X \in A)}} \left| \frac{1}{n} \sum_{i=1}^n z_i 1_{\{x_i \in A\}} - \mathbb{E}(z_1 1_{\{x_1 \in A\}}) \right| \leq V \sqrt{\bar{t}_1(\delta/2)} \right\}$$

517 Then by Lemma A.6 and Corollary A.8, we have  $\mathbb{P}(\mathcal{E}_1) \geq 1 - \delta/2$  and  $\mathbb{P}(\mathcal{E}_2) \geq 1 - \delta/2$ , hence  $\mathbb{P}(\mathcal{E}_1 \cap \mathcal{E}_2) \geq$   
518  $1 - \delta$ . Below we prove that when  $\mathcal{E}_1$  and  $\mathcal{E}_2$  hold true, inequality (50) holds true.

519 Note that for any  $A \in \mathcal{A}_{p,d} \setminus \mathcal{A}_{p,d}(\bar{t}(\delta/2))$ ,

$$\begin{aligned} & \frac{1}{\sqrt{\mathbb{P}(X \in A)}} \left| \frac{1}{n} \sum_{i=1}^n z_i 1_{\{x_i \in A\}} - \mathbb{E}(z_1 1_{\{x_1 \in A\}}) \right| \\ & \leq \frac{1}{\sqrt{\mathbb{P}(X \in A)}} \left| \frac{1}{n} \sum_{i=1}^n z_i 1_{\{x_i \in A\}} - \frac{1}{n} \sum_{i=1}^n z_i 1_{\{x_i \in A'\}} \right| \\ & \quad + \frac{1}{\sqrt{\mathbb{P}(X \in A)}} \left| \frac{1}{n} \sum_{i=1}^n z_i 1_{\{x_i \in A'\}} - \mathbb{E}(z_1 1_{\{x_1 \in A'\}}) \right| \\ & \quad + \frac{1}{\sqrt{\mathbb{P}(X \in A)}} \left| \mathbb{E}(z_1 1_{\{x_1 \in A'\}}) - \mathbb{E}(z_1 1_{\{x_1 \in A\}}) \right| \\ & := T_1 + T_2 + T_3 \end{aligned} \quad (51)$$

520 To bound  $T_1$ , we have

$$\begin{aligned} T_1 & = \frac{1}{\sqrt{\mathbb{P}(X \in A)}} \left| \frac{1}{n} \sum_{i=1}^n z_i 1_{\{x_i \in A' \setminus A\}} \right| \leq \frac{V}{\sqrt{\mathbb{P}(X \in A)}} \left( \frac{1}{n} \sum_{i=1}^n 1_{\{x_i \in A' \setminus A\}} \right) \\ & \leq \frac{V}{\sqrt{\mathbb{P}(X \in A)}} \max_{B \in \mathcal{B}_{p,d}} \left\{ \frac{1}{n} \sum_{i=1}^n 1_{\{x_i \in B\}} \right\} \leq \frac{V}{\sqrt{\mathbb{P}(X \in A)}} \bar{t}_2(\delta/2) \leq V \sqrt{\bar{t}_2(\delta/2)} \end{aligned} \quad (52)$$

521 where the second inequality makes use of Lemma A.5 (1), and the third inequality is by  $\mathcal{E}_1$ .

522 To bound  $T_2$ , note that

$$\begin{aligned} T_2 & = \sqrt{\frac{\mathbb{P}(X \in A')}{\mathbb{P}(X \in A)}} \frac{1}{\sqrt{\mathbb{P}(X \in A')}} \left| \frac{1}{n} \sum_{i=1}^n z_i 1_{\{x_i \in A'\}} - \mathbb{E}(z_1 1_{\{x_1 \in A'\}}) \right| \\ & \leq \sqrt{\frac{\mathbb{P}(X \in A')}{\mathbb{P}(X \in A)}} 2V \sqrt{\bar{t}_1(\delta/2)} \end{aligned} \quad (53)$$

523 where the inequality is by event  $\mathcal{E}_2$  and because  $A' \in \tilde{\mathcal{A}}_{p,d}$  and  $\mathbb{P}(X \in A') \geq \mathbb{P}(X \in A) \geq \bar{t}(\delta/2) \geq \bar{t}_1(\delta/2)$ .  
524 Note that

$$\mathbb{P}(X \in A' \setminus A) \leq \frac{2\bar{\theta}d}{n} \leq \bar{t}_2(\delta/2) \leq \mathbb{P}(X \in A) \quad (54)$$

525 where the first inequality is by Lemma A.5 (2); the second inequality is by the definition of  $\hat{t}_2(\delta/2)$  in (22); the  
526 third inequality is because  $A \in \mathcal{A}_{p,d} \setminus \mathcal{A}_{p,d}(\bar{t}(\delta/2))$ . As a result of (53) and (54), we have

$$T_2 \leq \sqrt{\frac{\mathbb{P}(X \in A' \setminus A) + \mathbb{P}(X \in A)}{\mathbb{P}(X \in A)}} 2V \sqrt{\bar{t}_1(\delta/2)} \leq 2\sqrt{2}V \sqrt{\bar{t}_1(\delta/2)} \quad (55)$$

527 To bound  $T_3$ , note that

$$\begin{aligned} T_3 &= \frac{1}{\sqrt{\mathbb{P}(X \in A)}} \left| \mathbb{E}(z_1 \mathbf{1}_{\{x_1 \in A' \setminus A\}}) \right| \leq \frac{V}{\sqrt{\mathbb{P}(X \in A)}} \mathbb{P}(X \in A' \setminus A) \\ &\leq V \sqrt{\mathbb{P}(X \in A' \setminus A)} \leq V \sqrt{2\bar{\theta}d/n} \leq V \sqrt{\bar{t}_2(\delta/2)} \end{aligned} \quad (56)$$

528 The proof is complete by combining inequalities (51), (52), (55) and (56), and note that

$$2V \sqrt{\bar{t}_2(\delta/2)} + 2\sqrt{2}V \sqrt{\bar{t}_1(\delta/2)} \leq 5V \sqrt{\bar{t}(\delta/2)}.$$

529

□

530 Now we are ready to wrap up the proof of Lemma A.1.

### 531 **Completing the proof of Lemma A.1**

532 Define events  $\mathcal{E}_1$  and  $\mathcal{E}_2$ :

$$\begin{aligned} \mathcal{E}_1 &:= \left\{ \sup_{A \in \mathcal{A}_{p,d} \setminus \mathcal{A}_{p,d}(\bar{t}(\delta/8))} \frac{1}{\sqrt{\mathbb{P}(X \in A)}} \left| \frac{1}{n} \sum_{i=1}^n \mathbf{1}_{\{x_i \in A\}} - \mathbb{P}(X \in A) \right| \leq 5\sqrt{\bar{t}(\delta/8)} \right\} \\ \mathcal{E}_2 &:= \left\{ \sup_{A \in \mathcal{A}_{p,d} \setminus \mathcal{A}_{p,d}(\bar{t}(\delta/8))} \frac{1}{\sqrt{\mathbb{P}(X \in A)}} \left| \frac{1}{n} \sum_{i=1}^n y_i \mathbf{1}_{\{x_i \in A\}} - \mathbb{E}(y_1 \mathbf{1}_{\{x_1 \in A\}}) \right| \leq 5U \sqrt{\bar{t}(\delta/8)} \right\} \end{aligned}$$

533 Then by Lemma A.9 with  $z_i = y_i$  and  $z_i = 1$  respectively, we know that  $\mathbb{P}(\mathcal{E}_i) \geq 1 - \delta/4$  for all  $i = 1, 2$ . So  
534 we know  $\mathbb{P}(\cap_{i=1}^2 \mathcal{E}_i) \geq 1 - \delta$ . Below we prove that inequality (23) is true when  $\cap_{i=1}^2 \mathcal{E}_i$  hold.

535 Define  $a := 100\bar{t}(\delta/8)$ . Then it holds

$$\sup_{A \in \mathcal{A}_{p,d}(a)} \sqrt{\mathbb{P}(X \in A)} \left| \mathbb{E}(f^*(X)|X \in A) - \bar{y}_{\mathcal{I}_A} \right| \leq 2U\sqrt{a} = 20U \sqrt{\bar{t}(\delta/8)} \quad (57)$$

536 On the other hand, for any  $A \in \mathcal{A}_{p,d} \setminus \mathcal{A}_{p,d}(a)$ , by event  $\mathcal{E}_1$ , we have

$$\frac{1}{n} \sum_{i=1}^n \mathbf{1}_{\{x_i \in A\}} \geq \mathbb{P}(X \in A) - 5\sqrt{\bar{t}(\delta/8)} \sqrt{\mathbb{P}(X \in A)} \geq \frac{1}{2} \mathbb{P}(X \in A) \quad (58)$$

537 where the second inequality is because  $\mathbb{P}(X \in A) \geq a = 100\bar{t}(\delta/8)$ . Therefore we know  $\sum_{i=1}^n \mathbf{1}_{\{x_i \in A\}} > 0$ ,  
538 and we can write

$$\begin{aligned} \mathbb{E}(f^*(X)|X \in A) - \bar{y}_{\mathcal{I}_A} &= \frac{\mathbb{E}(y_1 \mathbf{1}_{\{x_1 \in A\}})}{\mathbb{P}(X \in A)} - \frac{\frac{1}{n} \sum_{i=1}^n y_i \mathbf{1}_{\{x_i \in A\}}}{\frac{1}{n} \sum_{i=1}^n \mathbf{1}_{\{x_i \in A\}}} \\ &= \frac{1}{\mathbb{P}(X \in A)} \left( \mathbb{E}(y_1 \mathbf{1}_{\{x_1 \in A\}}) - \frac{1}{n} \sum_{i=1}^n y_i \mathbf{1}_{\{x_i \in A\}} \right) \\ &\quad + \frac{\sum_{i=1}^n y_i \mathbf{1}_{\{x_i \in A\}}}{\sum_{i=1}^n \mathbf{1}_{\{x_i \in A\}} \mathbb{P}(X \in A)} \left( \frac{1}{n} \sum_{i=1}^n \mathbf{1}_{\{x_i \in A\}} - \mathbb{P}(X \in A) \right) \\ &:= H_1(A) + H_2(A) \end{aligned} \quad (59)$$

539 By event  $\mathcal{E}_2$ , and note that  $a \geq \bar{t}(\delta/8)$ , we have

$$\sup_{A \in \mathcal{A}_{p,d} \setminus \mathcal{A}_{p,d}(a)} \sqrt{\mathbb{P}(X \in A)} |H_1(A)| \leq 5U \sqrt{\bar{t}(\delta/8)} \quad (60)$$

540 By event  $\mathcal{E}_1$ , and note that  $a \geq \bar{t}(\delta/8)$ , we have

$$\sup_{A \in \mathcal{A}_{p,d} \setminus \mathcal{A}_{p,d}(a)} \sqrt{\mathbb{P}(X \in A)} |H_2(A)| \leq 5U \sqrt{\bar{t}(\delta/8)} \quad (61)$$

541 Combining (59), (60) and (61), we have

$$\sup_{A \in \mathcal{A}_{p,d} \setminus \mathcal{A}_{p,d}(a)} \sqrt{\mathbb{P}(X \in A)} \left| \mathbb{E}(f^*(X)|X \in A) - \bar{y}_{\mathcal{I}_A} \right| \leq 10U \sqrt{\bar{t}(\delta/8)}$$

542 Combining the inequality above with (57) we have

$$\sup_{A \in \mathcal{A}_{p,d}} \sqrt{\mathbb{P}(X \in A)} \left| \mathbb{E}(f^*(X)|X \in A) - \bar{y}_{\mathcal{I}_A} \right| \leq 20U \sqrt{\bar{t}(\delta/8)} \leq 20U \sqrt{\bar{t}(\delta/12)}$$



543 **A.5 Proof of Lemma A.2**

544 Define  $a := \bar{t}(\delta/4)$  and  $b := a + \frac{2\bar{\theta}d}{n}$ . Define events  $\mathcal{E}_1$  and  $\mathcal{E}_2$ :

$$\begin{aligned} \mathcal{E}_1 &:= \left\{ \max_{A \in \tilde{\mathcal{A}}_{p,d}(b)} \frac{1}{n} \sum_{i=1}^n 1_{\{x_i \in A\}} \leq (e^2 b) \vee \frac{\log(2(n+1)^{2d} p^d / \delta)}{n} \right\} \\ \mathcal{E}_2 &:= \left\{ \sup_{A \in \mathcal{A}_{p,d} \setminus \tilde{\mathcal{A}}_{p,d}(a)} \frac{1}{\sqrt{\mathbb{P}(X \in A)}} \left| \mathbb{P}(X \in A) - \frac{1}{n} \sum_{i=1}^n 1_{\{x_i \in A\}} \right| \leq 5\sqrt{\bar{t}(\delta/4)} \right\} \end{aligned}$$

545 Then by Lemmas A.7 and A.9, we know that  $\mathbb{P}(\mathcal{E}_1) \geq 1 - \delta/2$  and  $\mathbb{P}(\mathcal{E}_2) \geq 1 - \delta/2$ , so  $\mathbb{P}(\mathcal{E}_1 \cap \mathcal{E}_2) \geq 1 - \delta$ .  
546 Below we prove (24) when  $\mathcal{E}_1 \cap \mathcal{E}_2$  holds.

547 For  $A \in \mathcal{A}_{p,d}$ , if  $\mathbb{P}(X \in A) \leq a$ , then  $\mathbb{P}(A') \leq a + \frac{2\bar{\theta}d}{n} = b$ . So we have

$$\begin{aligned} \sup_{A \in \mathcal{A}_{p,d}(a)} \frac{1}{n} \sum_{i=1}^n 1_{\{x_i \in A\}} &\leq \sup_{A \in \mathcal{A}_{p,d}(a)} \frac{1}{n} \sum_{i=1}^n 1_{\{x_i \in A'\}} \leq \sup_{\tilde{A} \in \tilde{\mathcal{A}}_{p,d}(b)} \frac{1}{n} \sum_{i=1}^n 1_{\{x_i \in \tilde{A}\}} \\ &\leq \left( e^2 \bar{t}(\delta/4) + 2e^2 \bar{\theta}d/n \right) \vee \frac{\log(2(n+1)^{2d} p^d / \delta)}{n} \\ &\leq (e^2 + 1) \bar{t}(\delta/4) \leq 25\bar{t}(\delta/4) \end{aligned} \tag{62}$$

548 where the third inequality is by event  $\mathcal{E}_1$  and the definition of  $b$ ; the fourth inequality is because

$$\bar{t}(\delta/4) \geq \bar{t}_1(\delta/4) \geq \frac{1}{n} \log(2p^d (n+1)^{2d} / \delta) \quad \text{and} \quad \bar{t}(\delta/4) \geq \bar{t}_2(\delta/4) \geq 2e^2 \bar{\theta}d/n.$$

549 As a result, we have

$$\begin{aligned} &\sup_{A \in \mathcal{A}_{p,d}(a)} \left| \sqrt{\mathbb{P}(X \in A)} - \sqrt{\frac{1}{n} \sum_{i=1}^n 1_{\{x_i \in A\}}} \right| \\ &\leq \sup_{A \in \mathcal{A}_{p,d}(a)} \max \left\{ \sqrt{\mathbb{P}(X \in A)}, \sqrt{\frac{1}{n} \sum_{i=1}^n 1_{\{x_i \in A\}}} \right\} \leq 5\sqrt{\bar{t}(\delta/4)} \end{aligned} \tag{63}$$

550 where the second inequality made use of (62).

551 On the other hand,

$$\begin{aligned} &\sup_{A \in \mathcal{A}_{p,d} \setminus \tilde{\mathcal{A}}_{p,d}(a)} \left| \sqrt{\mathbb{P}(X \in A)} - \sqrt{\frac{1}{n} \sum_{i=1}^n 1_{\{x_i \in A\}}} \right| \\ &= \sup_{A \in \mathcal{A}_{p,d} \setminus \tilde{\mathcal{A}}_{p,d}(a)} \frac{\left| \mathbb{P}(X \in A) - \frac{1}{n} \sum_{i=1}^n 1_{\{x_i \in A\}} \right|}{\sqrt{\mathbb{P}(X \in A)} + \sqrt{\frac{1}{n} \sum_{i=1}^n 1_{\{x_i \in A\}}}} \\ &\leq \sup_{A \in \mathcal{A}_{p,d} \setminus \tilde{\mathcal{A}}_{p,d}(a)} \frac{1}{\sqrt{\mathbb{P}(X \in A)}} \left| \mathbb{P}(X \in A) - \frac{1}{n} \sum_{i=1}^n 1_{\{x_i \in A\}} \right| \leq 5\sqrt{\bar{t}(\delta/4)} \end{aligned} \tag{64}$$

552 where the last inequality is by event  $\mathcal{E}_2$ .

553 Combining (63) and (64) the proof is complete.

## 554 B Proofs in Section 3

555 For any interval  $E \in \mathcal{E}$  and any univariate function  $g$  on  $[0, 1]$ , let  $V_g(E)$  be the total variation of  $g$  on  $E$ . For  
 556 the additive model (14) and a rectangle  $A = \prod_{j=1}^p E_j \in \mathcal{A}$ , define  $V_{f^*}(A) = \sum_{j=1}^p V_{f_j^*}(E_j)$ . Recall that  $X$   
 557 is a random variable with the same distribution as  $x_i$ , and  $X^{(j)}$  is the  $j$ -th coordinate of  $X$ .

### 558 B.1 Technical lemmas

559 **Lemma B.1** For any rectangle  $A \subseteq [0, 1]^p$ , any  $j \in [p]$  and any  $b \in \mathbb{R}$ , it holds

$$\Delta(A, j, b) = \left( \mathbb{E}(f^*(X)1_{\{X \in A_R\}}) - \mathbb{E}(f^*(X)|X \in A)\mathbb{P}(X \in A_R) \right)^2 \frac{\mathbb{P}(X \in A)}{\mathbb{P}(X \in A_L)\mathbb{P}(X \in A_R)}$$

560 where  $A_L = A_L(j, b)$  and  $A_R = A_R(j, b)$ .

561 *Proof.* We use the notations  $\nu := \mathbb{E}(f^*(X)|X \in A)$ ,  $\nu_L := \mathbb{E}(f^*(X)|X \in A_L)$  and  $\nu_R := \mathbb{E}(f^*(X)|X \in$   
 562  $A_R)$ . First, note that

$$\begin{aligned} & \mathbb{E}((f^*(X) - \nu)^2 1_{\{X \in A_L\}}) = \mathbb{E}((f^*(X) - \nu_L + \nu_L - \nu)^2 1_{\{X \in A_L\}}) \\ & = \mathbb{E}((f^*(X) - \nu_L)^2 1_{\{X \in A_L\}}) + (\nu_L - \nu)^2 \mathbb{P}(X \in A_L) \end{aligned} \quad (65)$$

563 Similarly, we have

$$\mathbb{E}((f^*(X) - \nu)^2 1_{\{X \in A_R\}}) = \mathbb{E}((f^*(X) - \nu_R)^2 1_{\{X \in A_R\}}) + (\nu_R - \nu)^2 \mathbb{P}(X \in A_R) \quad (66)$$

564 Summing up (65) and (66) we have

$$\begin{aligned} & (\nu_L - \nu)^2 \mathbb{P}(X \in A_L) + (\nu_R - \nu)^2 \mathbb{P}(X \in A_R) \\ & = \mathbb{E}((f^*(X) - \nu)^2 1_{\{X \in A\}}) - \mathbb{E}((f^*(X) - \nu_L)^2 1_{\{X \in A_L\}}) - \mathbb{E}((f^*(X) - \nu_R)^2 1_{\{X \in A_R\}}) \\ & = \Delta(A, j, b) \end{aligned} \quad (67)$$

565 Note that

$$\begin{aligned} & (\nu_L - \nu)^2 \mathbb{P}(X \in A_L) = \left( \mathbb{E}(f^*(X)1_{\{X \in A_L\}}) - \nu \mathbb{P}(X \in A_L) \right)^2 (\mathbb{P}(X \in A_L))^{-1} \\ & = \left( \nu \mathbb{P}(X \in A) - \mathbb{E}(f^*(X)1_{\{X \in A_R\}}) - \nu \mathbb{P}(X \in A_L) \right)^2 (\mathbb{P}(X \in A_L))^{-1} \\ & = \left( \nu \mathbb{P}(X \in A_R) - \mathbb{E}(f^*(X)1_{\{X \in A_R\}}) \right)^2 (\mathbb{P}(X \in A_L))^{-1} \\ & = (\nu_R - \nu)^2 \frac{(\mathbb{P}(X \in A_R))^2}{\mathbb{P}(X \in A_L)} \end{aligned} \quad (68)$$

566 Combining (67) and (68) we have

$$\begin{aligned} \Delta(A, j, b) & = (\nu_R - \nu)^2 \frac{(\mathbb{P}(X \in A_R))^2}{\mathbb{P}(X \in A_L)} + (\nu_R - \nu)^2 \mathbb{P}(X \in A_R) = (\nu_R - \nu)^2 \frac{\mathbb{P}(X \in A_R)\mathbb{P}(X \in A)}{\mathbb{P}(X \in A_L)} \\ & = \left( \mathbb{E}(f^*(X)1_{\{X \in A_R\}}) - \nu \mathbb{P}(X \in A_R) \right)^2 \frac{\mathbb{P}(X \in A)}{\mathbb{P}(X \in A_L)\mathbb{P}(X \in A_R)} \end{aligned}$$

567 □

568 **Lemma B.2** Suppose Assumption 2.1 holds true, and  $f^*$  has the additive structure in (14). Then for any  
 569  $A = \prod_{j=1}^p [\ell_j, u_j] \subseteq [0, 1]^p$ , it holds

$$\max_{j \in [p], b \in \mathbb{R}} \sqrt{\Delta(A, j, b)} \geq \frac{\sqrt{\mathbb{P}(X \in A)} \text{Var}(f^*(X)|X \in A)}{\sum_{k=1}^p \int_{\ell_k}^{u_k} \sqrt{q_A^{(k)}(t)(1 - q_A^{(k)}(t))} dV_{f_k^*}([\ell_j, t])}$$

570 where  $q_A^{(k)}(t) := \mathbb{P}(X^{(k)} \leq t | x_1 \in A)$ .

571 *Proof.* For a fixed  $A = \prod_{j=1}^p [\ell_j, u_j] \subseteq [0, 1]^p$ , without loss of generality, assume  $\mathbb{E}(f^*(X)|X \in A) = 0$ .

572 Note that for any  $j \in [p]$ ,

$$\max_{b \in \mathbb{R}} \sqrt{\Delta(A, j, b)} \geq \frac{\int_{\ell_j}^{u_j} \sqrt{q_A^{(j)}(s)(1 - q_A^{(j)}(s))} \sqrt{\Delta(A, j, s)} dV_{f_j^*}([\ell_j, s])}{\int_{\ell_j}^{u_j} \sqrt{q_A^{(j)}(s)(1 - q_A^{(j)}(s))} dV_{f_j^*}([\ell_j, s])} \quad (69)$$

573 where  $s$  the integration variable. Because  $q_A^{(j)}(s) = \mathbb{P}(X \in A_L(j, s))/\mathbb{P}(X \in A)$ , using Lemma B.1 and recall  
 574 that we have assumed  $\mathbb{E}(f^*(X)|X \in A) = 0$ , we have

$$\begin{aligned}
 & \int_{\ell_j}^{u_j} \sqrt{q_A^{(j)}(s)(1 - q_A^{(j)}(s))} \sqrt{\Delta(A, j, s)} dV_{f_j^*}([\ell_j, s]) \\
 &= \frac{1}{\sqrt{\mathbb{P}(X \in A)}} \int_{\ell_j}^{u_j} \left| \mathbb{E}(f^*(X)1_{\{X \in A_R(j, s)\}}) \right| dV_{f_j^*}([\ell_j, s]) \\
 &= \frac{1}{\sqrt{\mathbb{P}(X \in A)}} \int_{\ell_j}^{u_j} \left| \mathbb{E}(f^*(X)1_{\{X \in A\}}1_{\{X^{(j)} > s\}}) \right| dV_{f_j^*}([\ell_j, s]) \\
 &\geq \frac{1}{\sqrt{\mathbb{P}(X \in A)}} \left| \int_{\ell_j}^{u_j} \mathbb{E}(f^*(X)1_{\{X \in A\}}1_{\{X^{(j)} > s\}}) df_j^*(s) \right| \\
 &= \frac{1}{\sqrt{\mathbb{P}(X \in A)}} \left| \mathbb{E}(f^*(X)(f_j^*(X^{(j)}) - f_j^*(\ell_j))1_{\{X \in A\}}) \right| \\
 &= \frac{1}{\sqrt{\mathbb{P}(X \in A)}} \left| \mathbb{E}(f^*(X)f_j^*(X^{(j)})1_{\{X \in A\}}) \right|
 \end{aligned}$$

575 where the last equality makes use of the assumption that  $\mathbb{E}(f^*(X)|X \in A) = 0$ . Combining the inequality  
 576 above with (69), we have

$$\max_{b \in \mathbb{R}} \sqrt{\Delta(A, j, b)} \geq \frac{1}{\sqrt{\mathbb{P}(X \in A)}} \frac{\left| \mathbb{E}(f^*(X)f_j^*(X^{(j)})1_{\{X \in A\}}) \right|}{\int_{\ell_j}^{u_j} \sqrt{q_A^{(j)}(s)(1 - q_A^{(j)}(s))} dV_{f_j^*}([\ell_j, s])}$$

577 As a result, we have

$$\max_{j \in [p], b \in \mathbb{R}} \sqrt{\Delta(A, j, b)} \geq \frac{1}{\sqrt{\mathbb{P}(X \in A)}} \frac{\sum_{j=1}^p \left| \mathbb{E}(f^*(X)f_j^*(X^{(j)})1_{\{X \in A\}}) \right|}{\sum_{j=1}^p \int_{\ell_j}^{u_j} \sqrt{q_A^{(j)}(s)(1 - q_A^{(j)}(s))} dV_{f_j^*}([\ell_j, s])} \quad (70)$$

578 By the additive structure (14) we have

$$\sum_{j=1}^p \left| \mathbb{E}(f^*(X)f_j^*(X^{(j)})1_{\{X \in A\}}) \right| \geq \mathbb{E}((f^*(X))^2 1_{\{X \in A\}}) = \mathbb{P}(X \in A) \text{Var}(f^*(X)|X \in A) \quad (71)$$

579 Combining (70) and (71), the proof is complete.  $\square$

580 **Lemma B.3** Suppose Assumption 2.1 holds true, and  $f^*$  has the additive structure in (14). If for any  $A =$   
 581  $\prod_{j=1}^p [\ell_j, u_j] \subseteq [0, 1]^p$  and any  $k \in [p]$  it holds

$$\left( \int_{\ell_k}^{u_k} \sqrt{q_A^{(k)}(t)(1 - q_A^{(k)}(t))} dV_{f_k^*}([\ell_k, t]) \right)^2 \leq \frac{\tau^2}{u_k - \ell_k} \inf_{w \in \mathbb{R}} \int_{\ell_k}^{u_k} |f_k^*(t) - w|^2 dt \quad (72)$$

582 Then Assumption 2.2 is satisfied with  $\lambda = \theta/(p\tau^2\bar{\theta})$ .

583 *Proof.* Given  $A = \prod_{j=1}^p [\ell_j, u_j] \subseteq [0, 1]^p$ , without loss of generality, assume  $\mathbb{E}(f^*(X)|X \in A) = 0$ . Let  
 584  $p_X(\cdot)$  be the density of  $X$  on  $[0, 1]^p$ . Then we have

$$\text{Var}(f^*(X)|X \in A) = \frac{1}{\mathbb{P}(X \in A)} \int_A (f^*(z))^2 p_X(z) dz \geq \frac{\theta}{\mathbb{P}(X \in A)} \int_A (f^*(z))^2 dz \quad (73)$$

585 where the second inequality made use of Assumption 2.1 (i). Denote  $c_j := \frac{1}{u_j - \ell_j} \int_{\ell_j}^{u_j} f_j^*(t) dt$  and  $c :=$   
 586  $\sum_{j=1}^p c_j$ , then we have

$$\begin{aligned}
 \int_A (f^*(z))^2 dz &= \int_A \left( c + \sum_{j=1}^p f_j^*(z_j) - c_j \right)^2 dz_1 dz_2 \cdots dz_p \\
 &= \int_A c^2 + \sum_{j=1}^p (f_j^*(z_j) - c_j)^2 dz_1 dz_2 \cdots dz_p \\
 &\geq \sum_{j=1}^p \frac{\prod_{k=1}^p (u_k - \ell_k)}{u_j - \ell_j} \int_{\ell_j}^{u_j} (f_j^*(t) - c_j)^2 dt \\
 &\geq \frac{\mathbb{P}(X \in A)}{\bar{\theta}} \sum_{j=1}^p \frac{1}{u_j - \ell_j} \int_{\ell_j}^{u_j} (f_j^*(t) - c_j)^2 dt
 \end{aligned}$$

587 Combining the inequality above with (73) we have

$$\text{Var}(f^*(X)|X \in A) \geq \frac{\theta}{\bar{\theta}} \sum_{j=1}^p \frac{1}{u_j - \ell_j} \int_{\ell_j}^{u_j} (f_j^*(t) - c_j)^2 dt \quad (74)$$

588 We use  $H_k^2$  to denote the LHS of (72), then (72) implies

$$\frac{1}{u_j - \ell_j} \int_{\ell_j}^{u_j} |f_j^*(t) - c_j|^2 dt \geq \frac{1}{\tau^2} H_j^2 \quad (75)$$

589 As a result of (74) and (75), we have

$$\text{Var}(f^*(X)|X \in A) \geq \frac{\theta}{\bar{\theta}\tau^2} \sum_{j=1}^p H_k^2 \quad (76)$$

590 By Lemma B.2 we have

$$\begin{aligned} \max_{j \in [p], b \in \mathbb{R}} \Delta(A, j, b) &\geq \frac{\mathbb{P}(X \in A) \text{Var}(f^*(X)|X \in A)^2}{(\sum_{k=1}^p H_k)^2} \\ &\geq \frac{\theta}{\bar{\theta}\tau^2} \frac{\sum_{j=1}^p H_k^2}{(\sum_{k=1}^p H_k)^2} \mathbb{P}(X \in A) \text{Var}(f^*(X)|X \in A) \\ &\geq \frac{\theta}{p\bar{\theta}\tau^2} \mathbb{P}(X \in A) \text{Var}(f^*(X)|X \in A) \end{aligned}$$

591 where the second inequality is by (76), and the last inequality made use of the Cauchy-Schwarz inequality.

592  $\square$

### 593 B.2 Proof of Proposition 3.1

594 For any  $A = \prod_{j=1}^p [\ell_j, u_j] \subseteq [0, 1]^p$  and any  $k \in [p]$  it holds

$$\begin{aligned} \left( \int_{\ell_k}^{u_k} \sqrt{q_A^{(k)}(t)(1 - q_A^{(k)}(t))} dV_{f_k^*}([l_k, t]) \right)^2 &\leq \frac{1}{4} \left( \int_{\ell_k}^{u_k} |(f_k^*)'(t)| dt \right)^2 \\ &\leq \frac{\tau^2/4}{u_k - \ell_k} \inf_{w \in \mathbb{R}} \int_{\ell_k}^{u_k} |f_k^*(t) - w|^2 dt \end{aligned}$$

595 where the first inequality is by Cauchy-Schwarz inequality, and the second is because  $f_k^* \in LRP([0, 1], \tau)$ .

596 Using Lemma B.3, the proof of complete.

### 597 B.3 Proof of Proposition 3.2

598 For any  $A = \prod_{j=1}^p [\ell_j, u_j] \subseteq [0, 1]^p$  and any  $k \in [p]$ , we prove that

$$\left( \int_{\ell_k}^{u_k} \sqrt{q_A^{(k)}(t)(1 - q_A^{(k)}(t))} dV_{f_k^*}([l_k, t]) \right)^2 \leq \max \left\{ \frac{2r\bar{\theta}}{\theta}, \frac{r^2}{2\alpha} \right\} \frac{\max\{9\beta^2, 32 + \beta^2\}}{u_k - \ell_k} \inf_{w \in \mathbb{R}} \int_{\ell_k}^{u_k} |f_k^*(t) - w|^2 dt \quad (77)$$

599 Then the conclusion follows Lemma B.3.

600 For fixed  $A$  and  $k \in [p]$ , to simplify the notation, we denote  $g := f_k^*$ ,  $a := \ell_k$ ,  $b := u_k$ ,  $q(t) := q_A^{(k)}(t)$  for all

601  $t \in [\ell_k, u_k]$ , and  $t_j := t_j^{(k)}$  for  $j = 0, 1, \dots, r$ . Then (77) can be written as

$$\left( \int_a^b \sqrt{q(t)(1 - q(t))} dV_g([a, t]) \right)^2 \leq 2r \max \left\{ \frac{\bar{\theta}}{\theta}, \frac{r}{4\alpha} \right\} \frac{\max\{9\beta^2, 32 + \beta^2\}}{b - a} \inf_{w \in \mathbb{R}} \int_a^b (g(t) - w)^2 dt \quad (78)$$

602 For any  $s \in (0, 1)$ , define  $\Delta g(s) := \lim_{t \rightarrow s+} g(t) - \lim_{t \rightarrow s-} g(t)$ . Let  $j', j'' \in [r]$  such that  $t_{j'-1} \leq a < t_{j'}$

603 and  $t_{j''-1} < b \leq t_{j''}$ , and define  $r' = j'' - j' + 1$ , and

$$z_0 = a, z_1 = t_{j'}, z_2 = t_{j'+1}, \dots, z_{r'-1} = t_{j''-1}, z_{r'} = b.$$

604 Then we have

$$\begin{aligned} &\left( \int_a^b \sqrt{q(t)(1 - q(t))} dV_g([a, t]) \right)^2 \\ &= \left( \sum_{j=1}^{r'} \int_{z_{j-1}}^{z_j} \sqrt{q(t)(1 - q(t))} |g'(t)| dt + \sum_{j=1}^{r'-1} \sqrt{q(z_j)(1 - q(z_j))} \Delta g(z_j) \right)^2 \\ &\leq 2r' \sum_{j=1}^{r'} \left( \int_{z_{j-1}}^{z_j} \sqrt{q(t)(1 - q(t))} |g'(t)| dt \right)^2 + 2(r' - 1) \sum_{j=1}^{r'-1} q(z_j)(1 - q(z_j)) |\Delta g(z_j)|^2 \end{aligned} \quad (79)$$

605 We have the following 4 claims bounding the terms in the last line of the display above.

606 **Claim B.4** For  $j \in \{1, r'\}$ , it holds

$$\left( \int_{z_{j-1}}^{z_j} \sqrt{q(t)(1-q(t))} |g'(t)| dt \right)^2 \leq \frac{\bar{\theta} \beta^2}{\theta(b-a)} \inf_{w \in \mathbb{R}} \int_{z_{j-1}}^{z_j} (g(t) - w)^2 dt$$

607 *Proof of Claim B.4:* We just prove the claim for  $j = 1$ . The proof for  $j = r'$  follows a similar argument. To  
608 prove the claim for  $j = 1$ , we discuss two cases.

609 (Case 1)  $q(z_1) \leq 1/2$ . Then we have  $\sqrt{q(t)(1-q(t))} \leq \sqrt{q(z_1)(1-q(z_1))}$ , hence

$$\begin{aligned} \left( \int_a^{z_1} \sqrt{q(t)(1-q(t))} |g'(t)| dt \right)^2 &\leq q(z_1)(1-q(z_1)) \left( \int_a^{z_1} |g'(t)| dt \right)^2 \\ &\leq q(z_1)(1-q(z_1)) \frac{\beta^2}{z_1 - a} \inf_{w \in \mathbb{R}} \int_a^{z_1} (g(t) - w)^2 dt \quad (80) \\ &\leq \frac{\bar{\theta} \beta^2}{\theta(b-a)} \inf_{w \in \mathbb{R}} \int_a^{z_1} (g(t) - w)^2 dt \end{aligned}$$

610 where the second inequality is because  $g \in LRP((a, z_1), \beta)$ ; and the last inequality makes use of the fact  
611  $q(z_1) \leq \bar{\theta}(z_1 - a)/(\theta(b-a))$ .

612 (Case 2)  $q(z_1) > 1/2$ . Then we have

$$z_1 - a \geq \frac{\theta(b-a)}{\bar{\theta}} q(z_1) \geq \frac{\theta(b-a)}{2\bar{\theta}} \quad (81)$$

613 As a result,

$$\begin{aligned} \left( \int_a^{z_1} \sqrt{q(t)(1-q(t))} |g'(t)| dt \right)^2 &\leq \frac{1}{4} \left( \int_a^{z_1} |g'(t)| dt \right)^2 \leq \frac{\beta^2}{4(z_1 - a)} \inf_{w \in \mathbb{R}} \int_a^{z_1} (g(t) - w)^2 dt \\ &\leq \frac{\bar{\theta} \beta^2}{2\theta(b-a)} \inf_{w \in \mathbb{R}} \int_a^{z_1} (g(t) - w)^2 dt \end{aligned}$$

614 where the first inequality is by Cauchy-Schwarz inequality; the second inequality is because  $g \in$   
615  $LRP((a, z_1), \beta)$ ; the third inequality is by (81).

616 Combining (Caes 1) and (Case 2), the proof of Claim B.4 is complete.

617 □

618 **Claim B.5** For  $j \in \{1, r' - 1\}$ , it holds

$$q(z_j)(1-q(z_j)) |\Delta g(z_j)|^2 \leq \max \left\{ \frac{4\bar{\theta}}{\theta}, \frac{r}{\alpha} \right\} \frac{\max\{\beta^2, 4\}}{b-a} \inf_{w \in \mathbb{R}} \int_{z_0}^{z_2} (g(t) - w)^2 dt$$

619 *Proof of Claim B.5:* We just prove the claim for  $j = 1$ . The proof for  $j = r' - 1$  follows a similar argument. To  
620 prove the claim for  $j = 1$ , we discuss two cases.

621 (Case 1)  $|\Delta g(z_1)| > 4 \max\{\int_{z_0}^{z_1} |g'(t)| dt, \int_{z_1}^{z_2} |g'(t)| dt\}$ . Then by Lemma D.6 we have

$$\inf_{w \in \mathbb{R}} \int_{z_0}^{z_2} (g(t) - w)^2 dt \geq \min\{z_1 - z_0, z_2 - z_1\} \cdot \frac{(\Delta g(z_1))^2}{16} \quad (82)$$

622 Note that

$$\min\{z_1 - z_0, z_2 - z_1\} \geq \min \left\{ \frac{\theta q(z_1)}{\bar{\theta}}, \frac{\alpha}{r} (b-a) \right\} \geq \min \left\{ \frac{\theta q(z_1)}{\bar{\theta}}, \frac{\alpha}{r} \right\} (b-a) \quad (83)$$

623 So by (82) and (83) we have

$$|\Delta g(z_1)|^2 \leq \max \left\{ \frac{\bar{\theta}}{\theta q(z_1)}, \frac{r}{\alpha} \right\} \frac{16}{b-a} \inf_{w \in \mathbb{R}} \int_{z_0}^{z_2} (g(t) - w)^2 dt$$

624 As a result,

$$\begin{aligned} &q(z_1)(1-q(z_1)) |\Delta g(z_1)|^2 \\ &\leq \max \left\{ \frac{\bar{\theta}}{\theta} (1-q(z_1)), \frac{r}{\alpha} q(z_1)(1-q(z_1)) \right\} \frac{16}{b-a} \inf_{w \in \mathbb{R}} \int_{z_0}^{z_2} (g(t) - w)^2 dt \\ &\leq \max \left\{ \frac{\bar{\theta}}{\theta}, \frac{r}{4\alpha} \right\} \frac{16}{b-a} \inf_{w \in \mathbb{R}} \int_{z_0}^{z_2} (g(t) - w)^2 dt \end{aligned}$$

625 where the second inequality is by Cauchy-Schwarz inequality.

626 (Case 2)  $|\Delta g(z_1)| \leq 4 \max\{\int_{z_0}^{z_1} |g'(t)| dt, \int_{z_1}^{z_2} |g'(t)| dt\}$ . Then we have

$$q(z_1)(1 - q(z_1))|\Delta g(z_1)|^2 \leq 4q(z_1)(1 - q(z_1)) \max\left\{\int_{z_0}^{z_1} |g'(t)| dt, \int_{z_1}^{z_2} |g'(t)| dt\right\}^2 \quad (84)$$

627 By the same argument in (80), we have

$$4q(z_1)(1 - q(z_1))\left(\int_{z_0}^{z_1} |g'(t)| dt\right)^2 \leq \frac{4\bar{\theta}\beta^2}{\underline{\theta}(b-a)} \inf_{w \in \mathbb{R}} \int_{z_0}^{z_1} (g(t) - w)^2 dt \quad (85)$$

628 On the other hand,

$$\begin{aligned} 4q(z_1)(1 - q(z_1))\left(\int_{z_1}^{z_2} |g'(t)| dt\right)^2 &\leq \left(\int_{z_1}^{z_2} |g'(t)| dt\right)^2 \\ &\leq \frac{\beta^2}{z_2 - z_1} \inf_{w \in \mathbb{R}} \int_{z_1}^{z_2} (g(t) - w)^2 dt \leq \frac{r\beta^2}{\alpha(b-a)} \inf_{w \in \mathbb{R}} \int_{z_1}^{z_2} (g(t) - w)^2 dt \end{aligned} \quad (86)$$

629 where the second inequality is because  $g \in LRP((z_1, z_2), \beta)$ ; the last inequality is because  $z_2 - z_1 \geq \alpha/r \geq$   
630  $(\alpha/r)(b-a)$ . By (84), (85) and (86), we have

$$q(z_1)(1 - q(z_1))|\Delta g(z_1)|^2 \leq \max\left\{\frac{4\bar{\theta}}{\underline{\theta}}, \frac{r}{\alpha}\right\} \frac{\beta^2}{b-a} \inf_{w \in \mathbb{R}} \int_{z_0}^{z_2} (g(t) - w)^2 dt$$

631 Combining (Case 1) and (Case 2), the proof of Claim B.5 is complete.

632 □

633 **Claim B.6** For  $2 \leq j \leq r' - 1$ , it holds

$$\left(\int_{z_{j-1}}^{z_j} \sqrt{q(t)(1-q(t))} |g'(t)| dt\right)^2 \leq \frac{r\beta^2}{4\alpha} \inf_{w \in \mathbb{R}} \int_{z_{j-1}}^{z_j} (g(t) - w)^2 dt$$

634 *Proof of Claim B.6:* Note that

$$\begin{aligned} &\left(\int_{z_{j-1}}^{z_j} \sqrt{q(t)(1-q(t))} |g'(t)| dt\right)^2 \\ &\leq \frac{1}{4} \left(\int_{z_{j-1}}^{z_j} |g'(t)| dt\right)^2 \leq \frac{\beta^2}{4(z_j - z_{j-1})} \inf_{w \in \mathbb{R}} \int_{z_{j-1}}^{z_j} (g(t) - w)^2 dt \\ &\leq \frac{r\beta^2}{4\alpha(b-a)} \inf_{w \in \mathbb{R}} \int_{z_{j-1}}^{z_j} (g(t) - w)^2 dt \end{aligned}$$

635 where the first inequality is by Cauchy-Schwarz inequality; the second inequality is because  $g \in$   
636  $LRP((z_{j-1}, z_j), \beta)$ ; the last inequality is by the assumption that  $t_j - t_{j-1} \geq \alpha/r$ .

637 □

638 **Claim B.7** For  $2 \leq j \leq r' - 2$ , it holds

$$q(z_j)(1 - q(z_j))|\Delta g(z_j)|^2 \leq \frac{r \max\{\beta^2, 4\}}{\alpha} \inf_{w \in \mathbb{R}} \int_{z_{j-1}}^{z_{j+1}} (g(t) - w)^2 dt$$

639 *Proof of Claim B.7:* We discuss two cases.

640 (Case 1)  $|\Delta g(z_j)| > 4 \max\{\int_{z_{j-1}}^{z_j} |g'(t)| dt, \int_{z_j}^{z_{j+1}} |g'(t)| dt\}$ . Then by Lemma D.6 we have

$$\inf_{w \in \mathbb{R}} \int_{z_{j-1}}^{z_{j+1}} (g(t) - w)^2 dt \geq \min\{z_j - z_{j-1}, z_{j+1} - z_j\} \cdot \frac{(\Delta g(z_j))^2}{16} \geq \frac{\alpha}{r} \frac{(\Delta g(z_j))^2}{16}$$

641 As a result,

$$\begin{aligned} q(z_j)(1 - q(z_j))|\Delta g(z_j)|^2 &\leq \frac{16r}{\alpha} q(z_j)(1 - q(z_j)) \inf_{w \in \mathbb{R}} \int_{z_{j-1}}^{z_{j+1}} (g(t) - w)^2 dt \\ &\leq \frac{4r}{\alpha} \inf_{w \in \mathbb{R}} \int_{z_{j-1}}^{z_{j+1}} (g(t) - w)^2 dt \end{aligned}$$

642 (Case 2)  $|\Delta g(z_j)| \leq 4 \max\{\int_{z_{j-1}}^{z_j} |g'(t)| dt, \int_{z_j}^{z_{j+1}} |g'(t)| dt\}$ . Then we have

$$\begin{aligned}
& q(z_j)(1 - q(z_j))|\Delta g(z_j)|^2 \\
& \leq 4q(z_j)(1 - q(z_j)) \max\left\{\int_{z_{j-1}}^{z_j} |g'(t)| dt, \int_{z_j}^{z_{j+1}} |g'(t)| dt\right\}^2 \\
& \leq \max\left\{\int_{z_{j-1}}^{z_j} |g'(t)| dt, \int_{z_j}^{z_{j+1}} |g'(t)| dt\right\}^2 \\
& \leq \max\left\{\frac{\beta^2}{z_j - z_{j-1}} \inf_{w \in \mathbb{R}} \int_{z_{j-1}}^{z_j} (g(t) - w)^2 dt, \frac{\beta^2}{z_{j+1} - z_j} \inf_{w \in \mathbb{R}} \int_{z_j}^{z_{j+1}} (g(t) - w)^2 dt\right\} \\
& \leq \frac{\beta^2 r}{\alpha} \max\left\{\inf_{w \in \mathbb{R}} \int_{z_{j-1}}^{z_j} (g(t) - w)^2 dt, \inf_{w \in \mathbb{R}} \int_{z_j}^{z_{j+1}} (g(t) - w)^2 dt\right\} \\
& \leq \frac{\beta^2 r}{\alpha} \inf_{w \in \mathbb{R}} \int_{z_{j-1}}^{z_{j+1}} (g(t) - w)^2 dt
\end{aligned}$$

643 where the second inequality is by Cauchy-Schwarz inequality; the third inequality is because  $g \in$   
644  $LRP((z_{j-1}, z_j), \beta)$  and  $g \in LRP((z_j, z_{j+1}), \beta)$ .

645 Combining (Case 1) and (Case 2), and note that  $b - a \leq 1$ , the proof of Claim B.7 is complete.

646 □

### 647 **Completing the proof of Proposition 3.2**

648 By (79) and note that  $r' \leq r$ , we have

$$\begin{aligned}
& \left(\int_a^b \sqrt{q(t)(1 - q(t))} dV_g([a, t])\right)^2 \\
& \leq 2r \sum_{j=1}^{r'} \left(\int_{z_{j-1}}^{z_j} \sqrt{q(t)(1 - q(t))} |g'(t)| dt\right)^2 + 2r \sum_{j=1}^{r'-1} q(z_j)(1 - q(z_j))|\Delta g(z_j)|^2
\end{aligned} \tag{87}$$

649 By Claims B.4 and B.6, we have

$$\begin{aligned}
& \sum_{j=1}^{r'} \left(\int_{z_{j-1}}^{z_j} \sqrt{q(t)(1 - q(t))} |g'(t)| dt\right)^2 \\
& \leq \max\left\{\frac{\bar{\theta}\beta^2}{\theta(b-a)}, \frac{r\beta^2}{4\alpha}\right\} \sum_{j=1}^{r'} \inf_{w \in \mathbb{R}} \int_{z_{j-1}}^{z_j} (g(t) - w)^2 dt \\
& \leq \max\left\{\frac{\bar{\theta}}{\theta}, \frac{r}{4\alpha}\right\} \frac{\beta^2}{b-a} \inf_{w \in \mathbb{R}} \int_a^b (g(t) - w)^2 dt
\end{aligned} \tag{88}$$

650 By Claims B.5 and B.7, we have

$$\begin{aligned}
& \sum_{j=1}^{r'-1} q(z_j)(1 - q(z_j))|\Delta g(z_j)|^2 \\
& \leq \max\left\{\frac{4\bar{\theta}}{\theta}, \frac{r}{\alpha}\right\} \frac{\max\{\beta^2, 4\}}{b-a} \sum_{j=1}^{r'-1} \inf_{w \in \mathbb{R}} \int_{z_{j-1}}^{z_{j+1}} (g(t) - w)^2 dt \\
& \leq \max\left\{\frac{4\bar{\theta}}{\theta}, \frac{r}{\alpha}\right\} \frac{\max\{\beta^2, 4\}}{b-a} 2 \inf_{w \in \mathbb{R}} \int_a^b (g(t) - w)^2 dt \\
& = \max\left\{\frac{\bar{\theta}}{\theta}, \frac{r}{4\alpha}\right\} \frac{\max\{8\beta^2, 32\}}{b-a} \inf_{w \in \mathbb{R}} \int_a^b (g(t) - w)^2 dt
\end{aligned} \tag{89}$$

651 By (87), (88) and (89) we have

$$\begin{aligned}
& \left(\int_a^b \sqrt{q(t)(1 - q(t))} dV_g([a, t])\right)^2 \\
& \leq 2r \max\left\{\frac{\bar{\theta}}{\theta}, \frac{r}{4\alpha}\right\} \frac{\max\{9\beta^2, 32 + \beta^2\}}{b-a} \inf_{w \in \mathbb{R}} \int_a^b (g(t) - w)^2 dt
\end{aligned}$$

652 Hence (78) is true, and the proof of Proposition 3.2 is complete.

653 **B.4 Proof of Example 3.1**

654 Given  $[a, b] \subseteq [0, 1]$ , without loss of generality, assume  $\int_a^b g(t) = 0$  (because the infimum in  $w$  is achieved at  
655  $w = \int_a^b g(t)$ ). Let  $t_0 \in [a, b]$  be the point with  $g(t_0) = 0$ . Since  $g'(t) \geq c_1 > 0$ , we have

$$\int_{t_0}^b (g(t))^2 dt \geq \int_{t_0}^b (c_1(t - t_0))^2 dt = \frac{c_1^2}{3}(b - t_0)^3$$

656 Similarly,

$$\int_a^{t_0} (g(t))^2 dt \geq \int_a^{t_0} (c_1(t_0 - t))^2 dt = \frac{c_1^2}{3}(t_0 - a)^3$$

657 As a result, we have

$$\int_a^b (g(t))^2 dt \geq \frac{c_1^2}{3} \left( (b - t_0)^3 + (t_0 - a)^3 \right) \geq \frac{2c_1^2}{3} \left( \frac{b - a}{2} \right)^3 = \frac{c_1^2}{12} (b - a)^3 \quad (90)$$

658 On the other hand, since  $|g'(t)| \leq c_2$ , we have

$$\left( \int_a^b |g'(t)| dt \right)^2 \leq c_2^2 (b - a)^2 \quad (91)$$

659 Combining (90) and (91), we have

$$\left( \int_a^b |g'(t)| dt \right)^2 \leq \frac{12c_2^2}{c_1^2 (b - a)} \int_a^b (g(t))^2 dt$$

660 **B.5 Proof of Example 3.3**

661 It suffices to prove that there exists a constant  $C_r$  such that for any univariate polynomial with a degree at most  $r$   
662 and for any  $a < b$ ,

$$\left( \int_a^b |g'(t)| dt \right)^2 \leq \frac{C_r}{b - a} \int_a^b |g(t)|^2 dt \quad (92)$$

663 We first prove the conclusion when  $a = 0$  and  $b = 1$ . Let  $\mathcal{P}(r)$  be the set of all univariate polynomials with  
664 degree at most  $r$ . Note that  $\mathcal{P}(r)$  is a finite-dimensional linear space, and the differential operator  $\Phi : g \mapsto g'$  is  
665 a linear mapping on  $\mathcal{P}(r)$ . As a result, there exists  $C_r$  such that

$$\int_0^1 |g'(t)| dt \leq \sqrt{C_r} \int_0^1 |g(t)| dt$$

666 for all  $g \in \mathcal{P}(r)$ .

667 For general  $a < b$ , given  $g \in \mathcal{P}(r)$ , define  $h(s) := g(a + (b - a)s)$ , then  $h \in \mathcal{P}(r)$ . So we have

$$\int_0^1 |h'(s)| ds \leq \sqrt{C_r} \int_0^1 |h(s)| ds \quad (93)$$

668 Note that

$$\int_0^1 |h'(s)| ds = (b - a) \int_0^1 |g'(a + (b - a)s)| ds = \int_a^b |g'(t)| dt \quad (94)$$

669 and

$$\int_0^1 |h(s)| ds = \int_0^1 |g(a + (b - a)s)| ds = \frac{1}{b - a} \int_a^b |g(t)| dt \quad (95)$$

670 Combining (93), (94) and (95), we know that

$$\left( \int_a^b |g'(t)| dt \right)^2 \leq \left( \frac{\sqrt{C_r}}{b - a} \int_a^b |g(t)| dt \right)^2 \leq \frac{C_r}{b - a} \int_a^b |g(t)|^2 dt$$

671 where the last step is by Cauchy-Schwarz inequality.

672 **B.6 Proof of Example 3.2**

673 It suffices to prove that for any  $a, b \in [0, 1]$  with  $a < b$ , it holds

$$\int_a^b |g'(t)| dt \leq \frac{110(L/\sigma)}{b - a} \int_a^b |g(t)| dt \quad (96)$$

674 Once (96) is proved, the conclusion is true via Jensen's inequality.



675 Below we prove (96). Denote  $C = L/10$ . For given  $a, b \in [0, 1]$ , without loss of generality, we assume the  
676 median of  $g$  on  $[a, b]$  is 0, i.e.,  $\int_a^b 1_{\{g(t) \geq 0\}} dt = \int_a^b 1_{\{g(t) < 0\}} dt = (b-a)/2$  (otherwise translate by a constant).  
677 We discuss two different cases. We denote  $m := \min_{t \in [a, b]} \{ |g'(t)| \}$  and  $M := \max_{t \in [a, b]} \{ |g'(t)| \}$ .

678 (Case 1)  $m \geq C(b-a)$ . Since  $g$  is  $L$ -smooth on  $[0, 1]$ , we have

$$M \leq m + L(b-a)$$

679 Hence we have

$$\frac{M}{m} \leq 1 + \frac{L(b-a)}{m} \leq 1 + L/C \quad (97)$$

680 where the second inequality is by the assumption of (Case 1). Since  $\min_{t \in [a, b]} \{ |g'(t)| \} = m > 0$ , without loss  
681 of generality, we assume that  $g'(t) > 0$  for all  $t \in [a, b]$ . Denote  $t_0 = (a+b)/2$ . By our assumption that the  
682 median of  $g$  on  $[a, b]$  is 0, we know that  $g(t_0) = 0$ . Since  $g$  is convex, for any  $t \in [a, t_0]$ , we have

$$g(t_0) - g(t) \geq \frac{t_0 - t}{t_0 - a} (g(t_0) - g(a))$$

683 which implies  $g(t) \leq \frac{t_0 - t}{t_0 - a} (g(a) - g(t_0)) \leq 0$ . As a result, we have

$$\int_a^{t_0} |g(t)| dt \geq |g(t_0) - g(a)| \frac{t_0 - a}{2} \geq \frac{(t_0 - a)^2}{2} m = \frac{(b-a)^2}{8} m \quad (98)$$

684 On the other hand,

$$\int_a^b |g'(t)| dt \leq M(b-a) \quad (99)$$

685 Combining (98) and (99) we have

$$(b-a) \int_a^b |g'(t)| dt \leq \frac{8M}{m} \int_a^b |g(t)| dt \leq 8(1 + L/C) \int_a^b |g(t)| dt = 88 \int_a^b |g(t)| dt$$

686 where the second inequality made use of (97).

687 (Case 2)  $m < C(b-a)$ . Then by the  $L$ -smoothness of  $g$  we have

$$M \leq (C + L)(b-a)$$

688 so we have

$$\int_a^b |g'(t)| dt \leq M(b-a) \leq (C + L)(b-a)^2 \quad (100)$$

689 Define interval  $[t_1, t_2] := \{t \in [a, b] \mid g(t) \leq 0\}$ . By our assumption that the median of  $g$  on  $[0, 1]$  is 0, we  
690 have  $t_2 - t_1 = (b-a)/2$ . Denote  $t_0 = \operatorname{argmin}_{t \in [a, b]} g(t)$ . Define function  $f$  on  $[t_1, t_2]$ :

$$f(t) := \begin{cases} g(t_0) \cdot (t - t_1)/(t_0 - t_1) & t \in [t_1, t_0] \\ g(t_0) \cdot (t_2 - t)/(t_2 - t_0) & t \in [t_0, t_2] \end{cases}$$

691 Then  $0 \geq f(t) \geq g(t)$  for all  $t \in [t_1, t_2]$  (because  $g$  is convex). Note that

$$\int_{t_1}^{t_2} f(t) dt = \frac{1}{2} g(t_0)(t_0 - t_1) + \frac{1}{2} g(t_0)(t_2 - t_0) = \frac{1}{2} g(t_0)(t_2 - t_1) = \frac{1}{2} \int_{t_1}^{t_2} g(t_0) dt \quad (101)$$

692 As a result,

$$\int_{t_1}^{t_2} |g(t)| dt \geq \int_{t_1}^{t_2} |f(t)| dt = - \int_{t_1}^{t_2} f(t) dt = \int_{t_1}^{t_2} f(t) - g(t_0) dt \geq \int_{t_1}^{t_2} g(t) - g(t_0) dt \quad (102)$$

693 where the first and last inequalities are because  $0 \geq f(t) \geq g(t)$  for all  $t \in [t_1, t_2]$ ; the second equality is by  
694 (101). Note that for any  $t \in [t_1, t_2]$ ,

$$g(t) - g(t_0) \geq g'(t_0)(t - t_0) + \frac{\sigma}{2}(t - t_0)^2 \geq \frac{\sigma}{2}(t - t_0)^2 \quad (103)$$

695 where the first inequality is because  $g$  is  $\sigma$ -strongly-convex, and the second is because  $t_0$  is the minimizer of  $g$   
696 on  $[t_1, t_2]$ . By (102) and (103), we have

$$\int_{t_1}^{t_2} |g(t)| dt \geq \frac{\sigma}{2} \int_{t_1}^{t_2} (t - t_0)^2 dt \geq 2 \cdot \frac{\sigma}{2} \int_0^{(t_2 - t_1)/2} s^2 dt = \frac{\sigma}{24} (t_2 - t_1)^3 = \frac{\sigma}{192} (b-a)^3$$

697 Since  $g$  is convex on  $[a, b]$ , the median of  $g$  on  $[a, b]$  is 0, and  $[t_1, t_2] = \{t \in [a, b] \mid g(t) \leq 0\}$ , it is not hard to  
698 check that

$$\int_a^b |g(t)| dt \geq 2 \int_{t_1}^{t_2} |g(t)| dt \geq \frac{\sigma}{96} (b-a)^3 \quad (104)$$

699 Combining (100) and (104) we have

$$\int_a^b |g'(t)| dt \leq \frac{1}{b-a} \cdot \frac{96(C+L)}{\sigma} \int_a^b |g(t)| dt \leq \frac{110(L/\sigma)}{b-a} \int_a^b |g(t)| dt$$

700 where the last inequality made use of  $C = L/10$ .

701 The proof is complete by combining the discussions in (Case 1) and (Case 2).

702 **C Comparison of Theorem 2.3 and Theorem 1 of [10]**

703 We first restate Theorem 1 of [10] in the setting of fitting a single tree (note that [10] discussed random forest).

704 **Proposition C.1** (Theorem 1 of [10]) *Suppose Assumptions 2.2, 2.1 and ?? hold true. Let  $\widehat{f}^{(d)}(\cdot)$  be the tree*  
 705 *estimated by CART with depth  $d$ . Fixed constants  $\alpha_2 > 1$ ,  $0 < \eta < 1/8$ ,  $0 < c < 1/4$  and  $\delta > 0$  with*  
 706  *$2\eta < \delta < 1/4$ . Then there exists constant  $C > 0$  such that for all  $n$  and  $d$  satisfying  $1 \leq d \leq c \log_2(n)$ , it*  
 707 *holds*

$$\mathbb{E}(\|\widehat{f}^{(d)} - f^*\|_{L^2(\mu)}^2) \leq C \left( n^{-\eta} + (1 - \alpha_2^{-1}\lambda)^d + n^{-\delta+c} \right) \quad (105)$$

708 In particular, the RHS of (105) is lower bounded by

$$\Omega(n^{-\eta} + n^{-\delta+c} + n^{c \log_2(1-\lambda)}) \quad (106)$$

709 Note that (106) follows (105) by the fact  $1 \leq d \leq c \log_2(n)$  and  $\alpha_2 > 1$ . In the original Assumptions of  
 710 Theorem 1 in [10], it was assumed that the noises can be heavy-tailed, which is a weaker assumption than  
 711 Assumption 2.1. However, the parameter controlling the tails of the noises did not explicitly enter the error  
 712 bound (105), and it seems that their proof techniques cannot improve the error bound even under the assumption  
 713 that noises are bounded. In addition, the dependence on  $p$  was not explicitly stated in the bound (105), which  
 714 seems to be hidden in the constant  $C$ .

715 To compare our error bound with the error bound in (106), since the  $\|\widehat{f}^{(d)} - f^*\|_{L^2(\mu)}^2$  is bounded almost surely,  
 716 it is not hard to transform the high-probability bound in (11) to an bound in expectation, and we have

$$\mathbb{E}(\|\widehat{f}^{(d)} - f^*\|_{L^2(\mu)}^2) \leq O(n^{-\phi(\lambda)} \log(np) \log^2(n)) \quad (107)$$

717 Below we discuss two different cases.

718 • (Case 1)  $\lambda \geq 1/2$ . Then it holds

$$\phi(\lambda) = \frac{-\log_2(1-\lambda)}{1-\log_2(1-\lambda)} \geq \frac{-\log_2(1/2)}{1-\log_2(1/2)} = 1/2 \quad (108)$$

719 So our convergence rate in (107) is  $O(n^{-1/2} \log(np) \log^2(n))$ , but the rate in (106) is

$$\Omega(n^{-\eta} + n^{-\delta+c} + n^{c \log_2(1-\lambda)}) \geq \Omega(n^{-\eta}) \geq \Omega(n^{-1/8}) \quad (109)$$

720 • (Case 2)  $0 < \lambda \leq 1/2$ . Then it holds

$$1 - \log_2(1-\lambda) \leq 1 - \log_2(1/2) = 2 \quad (110)$$

721 and hence  $\phi(\lambda) \geq -\log_2(1-\lambda)/2$ . So our rate in (107) is  $O(n^{\log_2(1-\lambda)/2} \log(np) \log^2(n))$ , but  
 722 the rate in (106) is

$$\Omega(n^{-\eta} + n^{-\delta+c} + n^{c \log_2(1-\lambda)}) \geq \Omega(n^{c \log_2(1-\lambda)}) \geq \Omega(n^{\frac{1}{4} \log_2(1-\lambda)}) \quad (111)$$

723 **D Auxiliary results**

724 **Lemma D.1** (Bernstein's inequality) *Let  $Z_1, \dots, Z_n$  be i.i.d. random variables satisfying  $|\mathbb{E}((Z_1 -$*   
 725  *$\mathbb{E}(Z_1))^k)| \leq (1/2)k!\gamma^2 b^{k-2}$  for some constants  $\gamma, b > 0$  and for all  $k \geq 2$ . Then for any  $t > 0$ ,*

$$\mathbb{P}\left(\left|\frac{1}{n} \sum_{i=1}^n Z_i - \mathbb{E}(Z_i)\right| > t\right) \leq 2 \exp\left(-\frac{n}{4} \left(\frac{t^2}{\gamma^2} \wedge \frac{t}{b}\right)\right)$$

726 **Lemma D.2** (Binomial tail bound) *Let  $Z_1, \dots, Z_n$  be i.i.d. random variables with  $\mathbb{P}(Z_i = 1) = \alpha$  and*  
 727  *$\mathbb{P}(Z_i = 0) = 1 - \alpha$ . Then for any  $t \in (0, 1)$ ,*

$$\mathbb{P}\left(\frac{1}{n} \sum_{i=1}^n Z_i > t\right) \leq \exp\left(-n \left[t \log\left(\frac{t}{\alpha}\right) + (1-t) \log\left(\frac{1-t}{1-\alpha}\right)\right]\right)$$

728 **Lemma D.3** *For any  $t \in (0, 3/4)$ ,  $\log(1-t) > -t - t^2$ .*

729 *Proof.* For  $t \in (0, 3/4)$ ,

$$\log(1-t) + t + t^2 = \frac{t^2}{2} - \sum_{k=3}^{\infty} \frac{t^k}{k!} \geq \frac{t^2}{2} - \frac{1}{6} \sum_{k=3}^{\infty} t^k = \frac{t^2}{2} - \frac{t^3}{6(1-t)} > 0.$$

730 □

731 **Lemma D.4** Suppose  $Z$  is a random variable satisfying  $\mathbb{E}(e^{\lambda Z}) \leq e^{\lambda^2 \sigma^2 / 2}$  for all  $\lambda \in \mathbb{R}$ , where  $\sigma > 0$  is a  
 732 constant; then

$$\mathbb{E}(|Z|^k) \leq 9\sigma^k k!$$

733 *Proof.* By Chernoff inequality it holds  $\mathbb{P}(|Z| > t) \leq 2 \exp(-t^2/(2\sigma^2))$  for all  $t > 0$ . As a result,

$$\begin{aligned} \mathbb{E}(|Z|^k/(k!\sigma^k)) &\leq \mathbb{E}(e^{|Z|/\sigma}) = \int_0^\infty e^t \mathbb{P}(|Z|/\sigma > t) dt \\ &\leq \int_0^\infty 2 \exp\left(t - \frac{t^2}{2}\right) dt = 2\sqrt{e} \int_0^\infty \exp(-(t-1)^2/2) dt \\ &\leq 2\sqrt{e} \int_{-\infty}^\infty \exp(-t^2/2) dt = 2\sqrt{2\pi e} \leq 9 \end{aligned}$$

734

□

735 **Lemma D.5** For any integer  $k \geq 2$  it holds  $\frac{1}{k^2} - \frac{4}{(k+1)^3} \leq \frac{1}{(k+1)^2}$ .

736 *Proof.* For any  $k \geq 2$  it holds

$$\frac{(2k+1)(k+1)}{2k^2} = \left(1 + \frac{1}{2k}\right)\left(1 + \frac{1}{k}\right) \leq \left(1 + \frac{1}{4}\right)\left(1 + \frac{1}{2}\right) < 2$$

737 Multiplying  $2/(k+1)^3$  in the display above, we have

$$\frac{2k+1}{k^2(k+1)^2} < \frac{4}{(k+1)^3}$$

738 The proof is complete by noting that  $\frac{2k+1}{k^2(k+1)^2} = \frac{1}{k^2} - \frac{1}{(k+1)^2}$ . □

739 **Lemma D.6** Let  $[a, b]$  be a sub-interval of  $[0, 1]$ , and  $c \in (a, b)$ . Let  $h$  be a function on  $[a, b]$  such that  
 740  $h$  is differentiable on  $(a, c)$  and  $(c, b)$ , but can be discontinuous at  $c$ . Denote  $\Delta h(c) := \lim_{t \rightarrow c^+} h(t) -$   
 741  $\lim_{t \rightarrow c^-} h(t)$ . Suppose

$$\Delta h(c) > 4 \max \left\{ \int_a^c |h'(t)| dt, \int_c^b |h'(t)| dt \right\} \quad (112)$$

742 Then it holds

$$\inf_{w \in \mathbb{R}} \int_a^b (h(t) - w)^2 dt \geq \min\{c-a, b-c\} (\Delta h(c))^2 / 16$$

743 *Proof.* We assume that  $h$  is not continuous at  $c$ , since otherwise, the conclusion holds true trivially. We  
 744 use the notation  $h(c+) := \lim_{t \rightarrow c^+} h(t)$  and  $h(c-) := \lim_{t \rightarrow c^-} h(t)$ . Without loss of generality, assume  
 745  $h(c+) > h(c-)$ .

746 For  $w \geq (1/2)(h(c+) + h(c-))$ , it holds  $w - h(c-) \geq (1/2)\Delta h(c)$ . By (112), we know that for any  
 747  $t \in (a, c)$ ,

$$|h(t) - h(c-)| \leq \int_a^c |h'(\tau)| d\tau \leq \frac{1}{4}\Delta h(c)$$

748 Hence for all  $t \in (a, c)$ ,

$$w - h(t) = w - h(c-) + h(c-) - h(t) \geq \frac{1}{2}\Delta h(c) - \frac{1}{4}\Delta h(c) = \frac{1}{4}\Delta h(c)$$

749 As a result,

$$\int_a^b (h(t) - w)^2 dt \geq \int_a^c (h(t) - w)^2 dt \geq (c-a)(\Delta h(c))^2 / 16 \quad (113)$$

750 For  $w < (1/2)(h(c+) + h(c-))$ , similarly, we can prove

$$\int_a^b (h(t) - w)^2 dt \geq (b-c)(\Delta h(c))^2 / 16 \quad (114)$$

751 The proof is complete by combining (113) and (114).

752

□
